# 1 **A comprehensive toolkit for quick and easy visualization of marker proteins,** 2 **protein-protein interactions and cell morphology in *Marchantia polymorpha***

3

4 Jens Westermann\* <sup>[1,2]</sup>, Eva Koebeke\* <sup>[1]</sup>, Roswitha Lentz <sup>[1]</sup>, Martin Hülkamp <sup>[1]</sup>, Aurélien Boisson-  
5 Dernier <sup>[1,3]</sup>

6

7 [1] University of Cologne, Institute of Plant Sciences, 50674 Cologne, Germany

8 [2] Present address: Department of Biology, Institute of Molecular Plant Biology, Swiss Federal Institute  
9 of Technology in Zürich, 8092 Zürich, Switzerland

10 [3] Corresponding author

11 [\*] The authors contributed equally.

12

## 13 **Abstract**

14 Even though stable genomic transformation of sporelings and thalli of *Marchantia polymorpha* is  
15 comparatively straightforward and efficient, numerous problems can arise during critical phases of the  
16 process such as efficient spore production, poor selection capacity of antibiotics or low transformation  
17 efficiency. It is therefore also desirable to establish quick methods not relying on stable transgenics to  
18 analyze the localization, interactions and functions of proteins of interest. The introduction of foreign  
19 DNA into living cells via biolistic mechanisms has been first reported roughly 30 years ago and has been  
20 commonly exploited in established plant model species such as *Arabidopsis thaliana* or *Nicotiana*  
21 *benthamiana*. Here we report the fast and reliable transient biolistic transformation of *Marchantia*  
22 thallus epidermal cells using fluorescent protein fusions. We present a catalogue of fluorescent  
23 markers which can be readily used for tagging of a variety of subcellular compartments. Moreover, we  
24 report the functionality of the bimolecular fluorescence complementation (BiFC) in *M. polymorpha*  
25 with the example of the p-body markers MpDCP1/2. Finally, we provide standard staining procedures  
26 for live cell imaging in *M. polymorpha*, applicable to visualize cell boundaries or cellular structures, to  
27 complement or support protein localizations and to understand how results gained by transient  
28 transformations can be embedded in cell architecture and dynamics. Taken together, we offer a set of  
29 easy and quick tools for experiments that aim at understanding subcellular localization, protein-  
30 protein interactions and thus functions of proteins of interest in the emerging early diverging land  
31 plant model *M. polymorpha*.

32

## 33 **Introduction**

34 In the last decade the liverwort *Marchantia polymorpha* has emerged as a powerful model system to  
35 study early land plant evolution due to its early evolutionary divergence in the land plant phylogenetic  
36 tree (Shaw et al., 2011; Harrison, 2017; Morris, Puttick et al., 2017). Research deploying *M. polymorpha*  
37 has led to a series of insightful studies on the functional evolution of ABA (Lind et al., 2015; Eklund et  
38 al., 2018) and JA signaling mechanisms (Monte et al., 2018; Monte et al., 2019; Peñuelas et al., 2019),  
39 plant immunity (Carella et al., 2019; Gimenez-Ibanez et al., 2019), reproductive and vegetative  
40 development (Flores-Sandoval et al., 2015; Proust et al., 2016; Jones and Dolan, 2017; Rövekamp et  
41 al., 2017; Otani et al., 2018; Westermann et al., 2019) and cell division (Buschmann et al., 2015). It  
42 offers the advantage of genetic and morphological simplicity in combination with its dominant haploid  
43 vegetative life phase, allowing for fast generation of knockout mutants and subsequent phenotypic  
44 analyses, irrespectively of time-consuming homozygous mutant generation (Ishizaki et al., 2015 (B)).  
45 Concomitantly, a plethora of molecular genetic tools was developed that include stable transformation  
46 of developing spores (Ishizaki et al., 2008) and regenerating thallus fragments (Kubota et al., 2013),  
47 the suitability for genome editing via homologous recombination (Ishizaki et al., 2013) and  
48 CRISPR/Cas9 (Sugano et al., 2014; Sugano et al., 2018), the cultivation in axenic conditions and on soil  
49 and controlled crossing (Ishizaki et al., 2015 (B)).

50 Plant genetics and cell biological approaches generally rely on the efficient visualization of intracellular  
51 features, including protein localization and organelle architecture or dynamics. In this regard, the  
52 process of transient and stable transformation of plant cells is a powerful and commonly used  
53 technique in molecular genetics and cell biology to study protein dynamics, as well as genetic and  
54 physical (*i.e.* protein) interaction. It thus aids the elucidation of fundamental biological questions at  
55 the (sub)cellular scale. While the performance of stable biolistic transformation of immature thalli and  
56 spores has been reported before (Chiyoda et al., 2008, Chiyoda et al., 2014), we describe here the  
57 transient biolistic transformation of *Marchantia* thallus epidermal cells, a technique to study protein  
58 localization that has commonly been used in other plant systems for 30 years (Sanford, 1990; Ueki et  
59 al., 2009; Rasmussen et al., 1994). Importantly, we provide a comprehensive list of protein marker  
60 constructs that allows quick visualization of a variety of subcellular compartments within 24 hours and  
61 the possibility for live-imaging. The marker list comprises constructs for visualization of the nucleus,  
62 cytoplasm, plasma membrane, actin filaments, endosomes, peroxisomes, the Golgi apparatus and  
63 processing bodies (Tab. S1).

64 Genetic interaction studies often rely on assessment of physical protein interactions to elucidate  
65 intracellular signaling mechanisms. Therefore, the bimolecular fluorescence complementation  
66 technique (BiFC; Hu et al., 2002; Walter et al., 2004) represents a time-efficient method to test for

67 potentially interacting proteins *in vivo*. Hence, we also provide here evidence for the functionality of  
68 BiFC in *Marchantia* epidermal cells.

69 In addition to transient expression, dye-based staining procedures represent a fast and reliable  
70 method to (co)visualize subcellular compartment architecture and dynamics. Therefore, we here  
71 provide a series of staining protocols for different organelles, both for *Marchantia* thallus epidermal  
72 cells and rhizoids and compare functionality regarding standard protocols used for the seed plant  
73 model *Arabidopsis thaliana*.

74 To further complement the here provided comprehensive cell biological marker toolkit, we compiled  
75 a list of additional *Marchantia* resources, methods, tools and databases (Tab. 1) that altogether will be  
76 useful for the young and growing community by complementing and supporting genetic / cell  
77 biological / biochemical approaches using *M. polymorpha* as a model system.

78

## 79 **Materials and Methods**

80

### 81 ***Plant material and growth conditions***

82 The widely used *Marchantia polymorpha* Tak-1 (MpTak-1) ecotype was cultivated via propagation of  
83 vegetative propagules (gemmae) on solid Johnson's agar supplemented with 0.8 % micro agar under  
84 axenic conditions. Gemmae were grown under long day condition (16 h light/8 h darkness cycle) and  
85 white light irradiation ( $60 \mu\text{mol m}^{-1} \text{s}^{-1}$ ) at 21°C and 60 % humidity. After 2.5 - 3 weeks, a few thallus  
86 fragments of approximately  $0.5 - 1 \text{ cm}^2$  were transferred onto a small petri dish (6 – 9 cm in diameter)  
87 containing fresh solid Johnson's medium on the day of transformation (Fig. 1A).

88 The *Arabidopsis thaliana* Col-0 ecotype, that was used for DAPI staining, was cultivated on soil and  
89 grown under long day conditions at 21°C and  $120 \mu\text{mol m}^{-1} \text{s}^{-1}$  light intensity.

90

### 91 ***Cloning of DNA constructs***

92 All constructs used in this study are summarized in Tab. S1, including their origin, promoter, fluorescent  
93 tag and oligonucleotide sequences used for PCR-based amplification of new constructs from  
94 *Marchantia* whole-thallus cDNA. The 35S promoter was used for all expression experiments (except  
95 for expression of AtSYP32, AtGot1p and Lifeactin) to guarantee comparability of subsequent analyses.  
96 The coding sequences of interest were cloned into Gateway (GW)-compatible entry vectors,  
97 pDONR201 and pDONR207 (Invitrogen), and then remobilized to be integrated in the respective GW

98 destination vectors (Tab. S1). The cloning procedure was as described before (Westermann et al.,  
99 2019).

100

### 101 ***DNA sample preparation for biolistic transformation***

102 For a single shot, 300 ng of vector DNA were mixed with gold, serving as micro-carriers (30 mg/ml, 1  
103  $\mu\text{m}$ ),  $\text{CaCl}_2$  (2.5 M), spermidine (0.1 M) and  $\text{d}_2\text{H}_2\text{O}$  under thorough shaking. Subsequently, micro-carriers  
104 were washed with 70% EtOH and 100% EtOH. The DNA-coated gold particles were suspended in 100%  
105 EtOH and placed onto macro-carriers. The EtOH was allowed to vaporize and the prepared macro-  
106 carriers were then used for biolistic transformation.

107

### 108 ***Biolistic transformation procedure and efficiency of (co-)transformation***

109 Marchantia thallus fragments were placed into a PDS-1000 / He Biolistic<sup>®</sup> Particle Delivery System (Bio-  
110 Rad). A vacuum of 25 in Hg vac was applied and the DNA-coated gold particles were shot at 900 psi  
111 from a distance of 10 cm. Finally, the bombarded plant material was allowed to recover for 24 h in  
112 darkness while remaining in its humid environment, *i.e.* on the media in the closed petri dish (Fig. 1C).  
113 Biolistic transformation generally yielded  $n > 50$  transformed cells per sample shot. A representative  
114 example for transformation efficiency is shown in Fig. 1B. Moderate to strong expression levels in each  
115 individual cell could be observed irrespectively of the protein construct or promoter used (Fig. 1B; Tab.  
116 S1). The use of strong promoters such as pro35S, proAtUBQ10 or proMpEF1 $\alpha$  can sometimes lead to  
117 overexpression artefacts that may impede drawing secured conclusions. However, yielding a wide  
118 range of expression level in the same experimental round and plant sample allows for identification of  
119 biologically meaningful protein localization patterns and to distinguish them from unwanted artefacts,  
120 such as protein over-accumulations. In order to reliably assess the potential of transformed constructs  
121 as single cell fluorescent markers, we co-bombarded all described vectors with either the nuclear  
122 marker AtKRP1 or the plasma membrane markers AtNPSN12 or MpSYP13a fused to fluorescent tags  
123 and subsequently created a collection of functional and useful Arabidopsis- and Marchantia-derived  
124 fluorescent protein fusions (Tab. S1). In order to determine the efficiency of co-transformation, we  
125 counted cells expressing both markers in relation to the total number of transformed cells in 9  
126 independent co-transformations of protein fusions used in this study. Successful biolistic co-  
127 transformation was on average 74% efficient (see Tab. S3).

128

### 129 ***Staining procedures***

130 For FDA staining, young (2 – 5 days-old) gemmae were placed onto depression slides and covered with  
131 an FDA solution (5mg/L FDA in  $\text{ddH}_2\text{O}$ , diluted from a stock solution of 5 mg/ml FDA in acetone) for 5-  
132 10 min. Afterwards, samples were rinsed in  $\text{ddH}_2\text{O}$ .

133 For PI staining, young gemmae were placed onto depression slides and directly covered with a PI  
134 solution for 10 minutes (10 mg/L in  $\text{ddH}_2\text{O}$ ). Subsequently, samples were rinsed with  $\text{ddH}_2\text{O}$ .

135 For FM4-64 staining, young gemmae were mounted onto depression slides in 2  $\mu\text{M}$  FM4-64 diluted in  
136 liquid Johnson's growth medium (Ishizaki et al., 2008) and allowed to incubate for 10 minutes prior to  
137 imaging. For FM4-64 and FDA co-staining, gemmae were first stained in a FDA solution and then  
138 mounted in a FM4-64 solution, both as described above.

139 For DAPI staining, several methods were used. Experiments were done using 0, 4, and 7 days old  
140 gemmae. The DAPI staining solutions were composed of 10 – 100 mg/L DAPI in either 1xPBS-T  
141 (phosphate buffered saline + 0.1% Tween-20) and 5% DMSO or  $\text{ddH}_2\text{O}$  with 0.1 or 1% Tween-20 and 5%  
142 DMSO. Different staining incubation times of 10, 30 or 60 minutes were tested. The staining was tested  
143 with and without preceding or subsequent shaking of the samples in 70% EtOH at 80°C. To enhance  
144 permeability of membranes, 10 or 50 mg/L digitonin was added to the aforementioned staining  
145 solutions. As all attempts for staining living cells failed, the following fixation methods were tested.  
146 Gemmae were fixed in a 3:1 EtOH:acetic acid mixture on ice for 1 h, washed 3 times in 100% EtOH and  
147 stained in aforementioned DAPI solutions for 1 h. In another attempt, gemmae were fixed in 3%  
148 glutaraldehyde in 1x PBS-T (phosphate buffered saline + 0.1% Tween-20) overnight, subsequently  
149 washed in 1x PBS-T, and incubated in aforementioned DAPI solutions in darkness overnight.  
150 Furthermore, a modified version of a DAPI staining protocol published for gametophore leaves and  
151 protonemata of *Physcomitrella patens* (Sato et al., 2017) was used. Gemmae were placed in 3.7%  
152 formaldehyde in 1 x PBS for 30 min. Subsequently gemmae were immersed in 100% MeOH on ice for  
153 10 min. Afterwards, gemmae were soaked in 1% Triton X-100 and then stained with the  
154 aforementioned DAPI solutions for 30 min. Unfortunately, none of the experimental procedures  
155 described here led to a reliable staining of nuclei by DAPI in viable or dead epidermal cells of *M.*  
156 *polymorpha* gemmae.

157

### 158 **Confocal laser scanning microscopy**

159 The transformed or stained plant material was transferred onto a depression slide supplemented with  
160 300  $\mu\text{L}$   $\text{ddH}_2\text{O}$  and covered with a 18x18 mm cover slip. Microscopic analysis was performed using a  
161 Leica SP8 CLSM with an argon gas laser intensity set at 20 %. Fluorophore excitation and fluorescence  
162 caption were performed at the wavelength spectra shown in Tab. S2. Images were taken using a digital

163 gain of 100 % at a resolution of 1024 x 1024 pixels, a pinhole size of 1 AU, and a scan speed of 400-700  
164 Hz using bidirectional confocal scanning and HyD hybrid detectors. For the caption of multiple  
165 fluorophore types sequential or, if suitable, simultaneous scanning was performed.

166

### 167 ***Data processing and analysis***

168 Analysis of all microscopic captions was performed using ImageJ/FIJI (Schindelin et al., 2012), software  
169 version 1.51n. Data manipulation included maximum projections from Z-stacks ( $\leq 20$  frames, 1  $\mu\text{m}$  slice  
170 intervals) for some of the markers (as individually mentioned in the figure captions), as well as  
171 generation of composite images from separate individual channels.

172

## 173 **Results**

174

### 175 **A) Fluorescent protein markers to illuminate cellular compartments in *Marchantia***

176 To assess the potential capability of transiently transforming single *Marchantia* thallus epidermal cells,  
177 we first chose a set of proteins whose subcellular localization has been well studied in established  
178 model systems such as *Arabidopsis* or tobacco and thus could qualify as reliable subcellular markers in  
179 *Marchantia* as well.

180

### 181 **Nucleus**

182 We first picked the *Arabidopsis thaliana* INHIBITOR OF CYCLIN-DEPENDENT KINASE 1 (AtICK1)/ KIP-  
183 RELATED PROTEIN 1 (AtKRP1), which localizes to the nucleus and functions in cell growth,  
184 differentiation and cell cycle progression (Wang et al., 1998; De Veylder et al., 2001; Schnittger et al.,  
185 2003; Weinl et al., 2005; Jakoby et al., 2006). Upon biolistic transformation of *Marchantia* thalli, we  
186 observed AtKRP1-CFP protein localization to the nucleus of epidermal cells (Fig. 2A). We therefore co-  
187 transformed AtKRP1 as a nuclear marker and indicator of successful cell transformation in subsequent  
188 experiments.

189

### 190 ***Plasma membrane***

191 As a second potential marker, we chose the *Arabidopsis thaliana* NOVEL PLANT SNARE 12 (AtNPSN12),  
192 which represents a non-polar plasma membrane-localized protein commonly used as plasma  
193 membrane marker (Alassimone et al., 2012; Kirchhelle et al., 2016). Biolistically transformed  
194 *Marchantia thallus* epidermal cells showed AtNPSN12-mCherry fluorescence at the cell periphery  
195 consistent with plasma membrane localization (Fig. 2B). To confirm this localization, we co-  
196 transformed AtNPSN12-mCherry with the known *Marchantia* plasma membrane marker mCitrine-  
197 MpSYP13a (Kanazawa et al., 2016; Fig. 2C). As single and co-bombardments with AtNPSN12 showed  
198 (co)localization to the plasma membrane, we conclude that AtNPSN12-mCherry and mCitrine-  
199 MpSYP13a are both suitable plasma membrane markers for *Marchantia* epidermal cells (Fig. 2D).

200 Receptor-like kinases of the Malectin-like receptor kinase subfamily have been the subject of intensive  
201 research in the past years given their multitude of functions in plant development and immunity  
202 signaling (Franck et al., 2018 A). The Malectin-like receptors (MLRs) ANXUR1 and 2 (AtANX1/2) control  
203 cell wall integrity during pollen tube growth (Boisson-Dernier et al., 2009; Miyazaki et al., 2009) and  
204 negatively regulate plant immune responses in *Arabidopsis* (Mang et al., 2017) at the plasma  
205 membrane. During pollen tube growth control, AtANX1/2 act genetically upstream of the cytosolic and  
206 plasma membrane-attached receptor-like cytoplasmic kinase of the PTI1-like family, AtMRI, while the  
207 AtANX1 homolog AtFERONIA (AtFER) acts upstream of AtMRI during root hair growth control (Boisson-  
208 Dernier et al., 2015). We showed recently that tip-growth control in *Marchantia* rhizoids relies on an  
209 evolutionarily conserved signaling module comprised of the unique *Marchantia* MLR MpFER and its  
210 downstream component and unique *Marchantia* PTI1-like MpMRI, both of which show plasma  
211 membrane-localization comparable to their respective *Arabidopsis* homologs (Westermann et al.,  
212 2019). We transiently co-expressed the fluorescent protein fusions AtMRI-YFP, MpFER-YFP and  
213 MpMRI-YFP with AtNPSN12-mCherry. While MpFER-YFP showed signal exclusive to the plasma  
214 membrane, AtMRI and MpMRI displayed plasma membrane localization with traces in the cytoplasm  
215 as reported before (Fig. 3; Boisson-Dernier et al., 2015; Westermann et al., 2019).

216 Noteworthy, we also wanted to test expressing the plasma membrane localized *Arabidopsis* MLRs in  
217 *Marchantia* and thus co-transformed AtANX1-RFP with mCitrine-MpSYP13a and AtFER-Citrine with  
218 AtNPSN12-mCherry. Intriguingly, while many cells expressed the plasma membrane markers mCitrine-  
219 MpSYP13a and AtNPSN12-mCherry, a great majority of them did not show expression of either AtANX1  
220 or AtFER (Fig. S1A, B). This suggests that, unlike MpFER, the *Arabidopsis* MLRs fused to single  
221 fluorescent tag cannot be expressed in *Marchantia* epidermal cells. Thus, we next tried to express  
222 AtFER with a triple Citrine tag instead of a single one. It resulted in many Citrine-expressing cells but  
223 mostly in the cytoplasm, with no hints of plasma membrane localization (Fig. S1C). These results  
224 indicate that fusion of long protein tags may prevent transmembrane receptor kinases such as MLRs



225 to be correctly integrated into cellular membranes. To check if this was specifically due to Arabidopsis  
226 proteins or to certain protein families, we co-expressed MpFER-3xCitrine with MpFER-TdTomato and  
227 MpMRI-3xCitrine with MpMRI-RFP (Fig. S1D, E). Interestingly, the 3xCitrine tag didn't perturbate the  
228 cytosolic and plasma membrane localization of MpMRI, as MpMRI-3xCitrine co-localized with MpMRI-  
229 RFP at the cell periphery. However, while MpFER-TdTomato exhibited PM localization, MpFER-  
230 3xCitrine-derived signal was clearly present in the cytoplasm. Therefore, for some plasma membrane-  
231 localized protein families, fusion with a triple tag can lead to localization artefacts, and the use of single  
232 tag is thus recommended by default. Why MpFER but neither AtFER nor AtANX1 can be expressed in  
233 *Marchantia thallus* epidermis remains puzzling.

234

### 235 **Cytoplasm**

236 The *A. thaliana* type-one protein phosphatases (TOPP) AtATUNIS1/2 have recently been reported as  
237 negative regulators of cell wall integrity maintenance during Arabidopsis tip-growth (Franck et al., 2018  
238 B). The nucleocytoplasmic localization of AtAUN1-YFP and AtAUN2-YFP was demonstrated in  
239 Arabidopsis pollen tubes and leaf epidermal cells (Franck et al., 2018 B). In *Marchantia* epidermal cells,  
240 expression of AtAUN1/2-YFP led to a comparable nucleocytoplasmic localization, as opposed to the  
241 co-expressed plasma membrane localized AtNPSN12-mCherry fusion (Fig. 4), therefore qualifying  
242 these phosphatases as reliable *Marchantia* nucleocytoplasmic markers.

243

### 244 **Endosomes**

245 As for endosomal compartments, we chose two Ras-related in brain (RAB) GTPases, the canonical  
246 MpRAB5 and the plant-unique MpARA6, that were recently described in *M. polymorpha*. Both proteins  
247 were successfully expressed in stably transformed lines and co-localized to endosomal punctate  
248 structures stained by FM1-43 (Minamino et al., 2017). Upon biolistic co-transformation of the protein  
249 fusions mCherry-MpRAB5 and MpARA6-YFP with the nuclear marker AtKRP1-CFP (Fig. 5A and B), we  
250 found a comparable localization in punctate structures for both markers. Moreover, both GTPases  
251 strongly co-localized with each other (Fig. 5C) showing that MpRAB5 and MpARA6 are suitable  
252 endosomal markers also for transient transformation studies.

253

### 254 **Peroxisomes**



255 The carboxyl-terminal amino acid sequence serine-lysine-leucine (SKL) is well known as the consensus  
256 peroxisomal targeting sequence 1 (PTS1) and is sufficient to induce protein targeting and import to  
257 peroxisomes. SKL was first shown to be able to signal protein import into peroxisomes of mammalian  
258 cells (Gould et al., 1989) but later was also found to be functional in yeast and plants (Keller et al.,  
259 1991). In Arabidopsis, SKL motif fused to fluorescent tags is frequently used as a peroxisomal marker  
260 (Mathur et al., 2002, Rodríguez-Serrano et al., 2009, Kim et al., 2013). In *M. polymorpha*, SKL targeting  
261 was utilized for evaluation of CRISPR-Cas9 modules (Konno et al., 2018). In transiently transformed *M.*  
262 *polymorpha* cells, we also found a clear and distinct localization of mCherry-SKL in punctate structures,  
263 likely representing peroxisomes (Fig. 6A).

264

### 265 ***Actin filaments***

266 Both the Lifeact peptide - a short peptide of 17 amino acids – and the C-terminal 197 amino acids of  
267 mouse talin are known to bind to filamentous actin (Kost et al., 1998; Riedl et al., 2008). Therefore, to  
268 visualize the actin filaments in Marchantia epidermal cells, we used the Citrine-mTalin and LifeAct-  
269 Citrine reporters described previously (Kimura and Kodama, 2016). As in stably transformed  
270 Marchantia lines (Kimura and Kodama, 2016), both markers successfully revealed the actin filament  
271 networks around chloroplasts in epidermal cells (Fig. 6B, C).

272

### 273 ***Golgi apparatus***

274 As potential markers for the Golgi apparatus, we selected the Arabidopsis proteins SYNTAXIN OF  
275 PLANTS 3 (AtSYP3) and the GOLGI TRANSPORT 1 p homolog (AtGot1p). Both proteins have been shown  
276 to localize to the Golgi apparatus (Uemura et al., 2004; Conchon et al., 1999) and are reliable Golgi  
277 markers for Arabidopsis, as being part of the Wave line multicolor marker set for membrane  
278 compartments (WAVE22 and WAVE18, respectively; Geldner et al., 2009). Upon transient biolistic  
279 expression of YFP-AtSYP3 and YFP-AtGot1p in *M. polymorpha*, a distinct and comparable localization  
280 pattern of both proteins, likely representing the Golgi apparatus, was visible (Fig. 7A and B).  
281 Furthermore, upon co-expression of CFP-AtSYP3 and YFP-AtGOT1p, we also found perfect co-  
282 localization (Fig. 7C) confirming that both markers are reliable to illuminate the Golgi in Marchantia.

283

### 284 ***mRNA processing bodies***

285 mRNA processing bodies (p-bodies), have been found to play a crucial role in mRNA processing  
286 comprising deadenylation, decapping, degradation, mRNA storage and mRNA quality control  
287 (thoroughly reviewed for *A. thaliana* in Maldonado-Bonilla, 2014). As p-bodies markers, we chose the  
288 *Arabidopsis thaliana* DECAPPING PROTEIN 1 (AtDCP1) and AtDCP2, whose function has been well  
289 studied in the past years (Xu et al., 2006; Xu and Chua, 2009; Steffens et al., 2015; Bhasin et al., 2017).  
290 Upon transformation of the protein fusion AtDCP1-mCherry we found a comparable expression in dot-  
291 like structures, likely representing p-bodies (Fig. 8A). In contrast, transformation of mCherry-AtDCP2  
292 revealed a diffused expression throughout the cytoplasm and in the nucleus (Fig. 8B), as reported in  
293 *Arabidopsis* in the absence of stress (Motomura et al., 2014). Therefore, we assume that AtDCP2 is  
294 also generally localized in the cytoplasm and nucleus in *M. polymorpha* and is only recruited to p-  
295 bodies upon stress conditions (Motomura et al., 2014).

296 The similar localization of AtDCP1/2 in *Arabidopsis* (Iwasaki et al., 2007; Motomura et al., 2014) and  
297 *Marchantia* suggests that the function of DCPs in mRNA processing has been evolutionarily conserved.  
298 To assess whether the two *Marchantia* DCP-homologs MpDCP1/2 localize similarly as their *Arabidopsis*  
299 counterparts, we transformed different combinations of fluorescent fusions (MpDCP1-mCherry,  
300 MpDCP1-YFP, MpDCP2-mCherry, MpDCP2-YFP). As anticipated, MpDCP1 displayed a dot-like  
301 localization pattern similar to AtDCP1, while MpDCP2 exhibited an AtDCP2-like nucleocytoplasmic  
302 localization (Fig. 8C and D).

303

## 304 **B) Bimolecular fluorescence complementation**

305 Based on former reports of AtDCP1 to regulate mRNA decay and to recruit further functionally relevant  
306 proteins, such as AtDCP2, to p-bodies (Iwasaki et al., 2007; Motomura et al., 2014), as well as our own  
307 observations (see above), we selected MpDCP1/2 as promising candidates to assess the feasibility of  
308 studying protein-protein interactions in *M. polymorpha* via bimolecular fluorescence  
309 complementation (BiFC). The BiFC technique relies on the co-expression of two proteins fused to the  
310 N- or C-terminal part of a fluorescent reporter (*e.g.* -YFP<sub>N</sub> and -YFP<sub>C</sub>, respectively). Upon physical  
311 interaction of the two tagged proteins of interest, the N- and C-terminal parts of the reporter can  
312 reconstitute a functional fluorescent protein. Capture of the respective fluorescent signal thus is used  
313 as an indicator for protein-protein interaction. For BiFC to be meaningful, the co-transformation of  
314 both reporter halves must lead to regular and frequent co-expression, which is the case for *Marchantia*  
315 thallus transient biolistic transformation as it reaches, in our hands, 74% on average (see Material and  
316 Methods section and Tab. S3). The physical interaction of AtDCP1/2 was foremost reported in *in vitro*

317 pull-down assays (Xu et al., 2006) and later independently confirmed by BiFC in tobacco mesophyll  
318 protoplasts (Weber et al., 2008).

319 Interestingly, upon co-expression of YFP<sub>N</sub>-MpDCP2 and YFP<sub>C</sub>-MpDCP1, together with the nuclear  
320 marker AtKRP1-CFP, we could observe a clear and specific YFP signal in dot-like structures, suggesting  
321 that MpDCP1/2 are capable of interacting physically in p-bodies of Marchantia epidermal cells (Fig.  
322 9A). To exclude the possibility of false positive signals (Kodama et al., 2012) in our experimental setup  
323 we also transformed YFP<sub>N</sub>-MpDCP2 and YFP<sub>C</sub>-MpDCP1 with YFP<sub>C</sub>-MpLYST interacting protein 5  
324 (MpLIP5) and AtMYC related protein1 (AtMYC1)-YFP<sub>N</sub> tags, respectively. Expression of both vector  
325 combinations led to the absence of a YFP signals in cells expressing AtKRP1-CFP (Fig. 9B and C),  
326 indicating that the observed interaction between MpDCP1 and MpDCP2 is specific. The integrity of  
327 YFP<sub>C</sub>-MpLIP5 was confirmed by co-expression with the Marchantia homolog of a known interactor of  
328 LIP5 in Arabidopsis - MpSuppressor of K<sup>+</sup> Transport Growth Defect1 (MpSKD1) (Haas et al., 2007), N-  
329 terminally fused to YFP<sub>N</sub>, showing a clear YFP signal in punctate structures consistent with localization  
330 to p-bodies (Fig. S2A). The integrity of AtMYC1-YFP<sub>N</sub> was shown by a BiFC interaction in the nucleus  
331 with its known interaction partner AtTRANSPARENT TESTA GLABRA1 (TTG1) (Zimmermann et al., 2014,  
332 Zhao et al., 2012; control used in Steffens et al., 2017), C-terminally fused to YFP<sub>C</sub> (Fig. S2B). In  
333 conclusion, our results show that BiFC is functional in Marchantia and can be used to quickly assess  
334 protein-protein interactions *in vivo*.

335

### 336 **C) Staining intracellular structures in *M. polymorpha***

337 For the visualization of a cell and the investigation of cellular architecture and dynamics, it is crucial to  
338 have several quick and reliable staining methods for live cell imaging at hand. Therefore, we tested  
339 some standard staining procedures to label intracellular compartments and cellular structures  
340 (including the plasma membrane, cytoplasm, cell wall and nucleus) in *M. polymorpha* gemmae that  
341 have been established for other plants but lacking ready-to-use protocols for Marchantia.

342

#### 343 ***Fluorescein diacetate (FDA) for cytoplasm staining of living cells***

344 FDA is a cell-permeable, per se non-fluorescent esterase substrate. As soon as it passes the plasma  
345 membrane, it is hydrolyzed by esterases in the cytoplasm of viable cells (Rotman and Papermaster,  
346 1966). Thereby, FDA is converted to a negatively charged, green-fluorescent fluorescein unable to  
347 either cross back the plasma membrane or pass the tonoplast and thus it accumulates in the  
348 cytoplasm. Owing to these properties, FDA is suitable for cell viability assays and can be used as a

349 negative stain for vacuoles. In Arabidopsis, FDA staining has been reliably used for testing root hair and  
350 guard cell viability (Schapire et al., 2008; Hao et al., 2012) ,to visualize vacuoles in root hairs (Saedler  
351 et al., 2009) and trichomes (Mathur et al., 2003), and to study pathogen response (Jones et al., 2016).

352 Here, we successfully utilized FDA to stain the cytoplasm of rhizoids and epidermal cells in young  
353 gemmae (Fig. 10). FDA showed a strong, green fluorescence already after a short incubation time of  
354 10 minutes, demonstrating the viability of rhizoids and epidermal cells. We here present FDA as a tool  
355 to be readily used for visualization of the cytoplasm in *M. polymorpha*. As it is not able to pass the  
356 tonoplast, it can also be used to detect vacuolar architecture, especially in rhizoids, where vacuolar  
357 volume was clearly visible after staining with FDA (Fig. 10D).

358

### 359 ***Propidium iodide for cell wall staining***

360 Propidium iodide (PI) is an intercalating, red-fluorescent cell dye. It penetrates damaged cell  
361 membranes and visualizes nuclei of dead cells by intercalating DNA with low base preference.  
362 However, PI cannot pass intact cell membranes and thus is excluded from viable cells, while remaining  
363 fluorescent. Therefore, PI can also readily be used to visualize cell wall of living cells. In Arabidopsis, PI  
364 is regularly utilized for counterstaining of cell walls (Takano et al., 2002, Ubeda-Tomás, 2008), such as  
365 for viability assays, frequently combined with FDA (Shahriari et al., 2010, Kong et al., 2018).

366 We here show successful PI staining of cell walls of *M. polymorpha* (Fig. 11). Strong fluorescence was  
367 observed already after short incubation times of 10 min. PI reliably stained the cell walls of living  
368 epidermal cells (Fig. 11A) and rhizoids (Fig. 11B) and thus can reveal cell shape and size. This staining  
369 was non-toxic as stained rhizoids kept elongating, thereby revealing the usefulness of PI staining for  
370 studying rhizoid tip-growth (Video S1).

371

### 372 ***Nuclei of M. polymorpha cannot be reliably stained with 4',6-diamidino-2-phenylindole (DAPI)***

373 DAPI is one of the most common DNA fluorochromes enabling staining and visualization of nuclei of  
374 dead but also viable cells, as it is able to pass cell membranes – however often with weak effectiveness.  
375 Upon excitation with ultraviolet light, DAPI emits blue fluorescence at a maximum of 461 nm. DAPI  
376 binds stoichiometrically to adenine-thymine rich regions of DNA. DAPI also has a weak binding capacity  
377 to RNA, however emission is then shifted to 500 nm. Thus, DAPI is frequently utilized not only to  
378 visualize nuclei in trichomes, epidermal pavement cells or root cells (Kirik et al., 2001, Spitzer et al.,  
379 2006, Lee et al., 2006), but also to quantify DNA content in Arabidopsis, being a reliable tool to discover  
380 endoreduplication (Schnittger and Hülkamp, 2007, Bramsiepe et al., 2010, Bhosale et al., 2018).

381 Kondou et al., 2019, report a functional DAPI staining of nuclei in wholemount samples of fixed  
382 epidermal cells of *M. polymorpha*. In this study, we tested staining of fixed (i.a. after a modified version  
383 of the protocol by Kondou et al., 2019) but also of viable thallus epidermal cells of Marchantia.  
384 Surprisingly, despite usage of gemmae at different developmental stages, short to long DAPI  
385 incubation periods, preceding and subsequent de-staining steps using EtOH, different methods of  
386 fixation (for more details see Material and Methods section), we were unable to stain and visualize  
387 nuclei of Marchantia with DAPI (Fig. S3). In our hands, DAPI accumulated on cell walls and to a weaker  
388 extent in the cytoplasm but did not enter the nucleus. To demonstrate functionality of the used DAPI  
389 solution, we stained Arabidopsis leaves in parallel (Fig. S3), showing strong and distinctive visualization  
390 of nuclei. Staining of DNA by PI after fixation also failed in our hands (data not shown). It remains to  
391 be elucidated, why nuclei of *M. polymorpha* seem to be hardly accessible to DNA fluorochromes. Until  
392 then, we either suggest to use a protein marker localizing in nuclei (*e.g.* AtKRP1) and to generate stably  
393 expressing Marchantia lines if needed; or to visualize S-phase nuclei with 5-Ethynyl-2'-deoxyuridine  
394 (EdU) staining, as reports show its functionality in *M. polymorpha* (Furuya et al., 2018, Busch et al.,  
395 2019)

396

#### 397 ***FM4-64 staining for visualization of plasma membrane and endocytic vesicles***

398 The lipophilic steryl dye FM4-64 (3-triethylammoniumpropyl)-4-(6-(4-(diethylamino)-phenyl)-  
399 hexatrienyl) pyridinium-dibromide) is commonly used as marker for the outer leaf of the cellular  
400 plasma membrane. Staining of young gemmae with FM4-64 resulted in a clear fluorescence signal at  
401 the cellular boundaries, likely representing the plasma membrane (Fig. 12A). Upon co-staining with  
402 FDA, the FM4-64-specific plasma membrane signal at the cell periphery was clearly distinct from the  
403 cytoplasmic FDA signal (Fig. 12B). Altogether, these findings support FM4-64 as a reliable marker dye  
404 to label the outer cellular membrane via single or co-staining in Marchantia.

405

#### 406 **Concluding remarks**

407 We here present a comprehensive and reliable toolkit for visualization of intracellular architecture and  
408 dynamics in *M. polymorpha*, an emerging model system used to study land plant evolution. All  
409 methods described are based on standard techniques used in other systems and can be executed and  
410 analyzed within 1 - 2 working days, therefore allowing time-efficient analysis of basic intracellular  
411 traits, such as organelle organization and cell architecture, both in fixed and viable cells. The possibility  
412 to mark viable cells additionally allows their analysis in live-imaging setups, as we demonstrate with  
413 growing rhizoids stained with PI. A comprehensive list of transiently expressed markers covering the

414 majority of intracellular organelles and structures, allows fast assessment of aforementioned  
415 intracellular dynamics in viable cells, but also provides a quick possibility for initial tests of functionality  
416 and correct localization of cloned fluorescent constructs before committing to comparatively time-  
417 costly stable plant transformation. Finally, we demonstrate the BiFC system to be functional in  
418 *Marchantia* epidermal cells, thus representing a quick and straightforward technique to test for  
419 protein-protein interactions *in vivo*, which should be confirmed with other protein-protein interaction  
420 assays such as Yeast-2-Hybrid-like, FRET-FLIM and protein pulldown approaches. Altogether, we  
421 provide a series of quick and useful techniques to exploit the potential of an emerging model system  
422 to the maximum extent possible.

423

#### 424 **Acknowledgements**

425 We thank Dr. Marc Jakoby for providing aliquots of the AtKRP, SKL motif, AtNPSN12, AtSYP32 and  
426 AtGot1p homolog vectors. We thank Dr. Alexandra Steffens for providing aliquots of the AtDCP1 and  
427 AtDCP2 expression vectors. We thank Dr. Lisa Stephan for providing aliquots of the AtMYC1 and  
428 AtTTG1 BiFC vectors. We thank Dr. Clement Champion and the research group of Prof. Liam Dolan  
429 (University of Oxford) for provision of an aliquot of the PM marker vector MpSYP13a. We thank Dr.  
430 Joachim F. Uhrig for donation of pCL112/113 vectors. This research was partly funded by a short-term  
431 stipend of the Deutscher Akademischer Austauschdienst (DAAD) to J.W.; the University of Cologne,  
432 and grant from the University of Cologne Centre of Excellence in Plant Sciences to A.B.-D.

433

#### 434 **Author contributions**

435 J.W., E.K., M.H. and A.B.-D. conceived the experiments.

436 J.W., E.K., R.L. and A.B.-D. performed the experiments.

437 J.W., E.K. and A.B.-D analyzed the data.

438 J.W. and E.K. wrote the manuscript with contributions of M.H. and A.B.-D.

439

#### 440 **Declaration of interests**

441 The authors declare no competing interests.

442

443 **References**

- 444 **Alassimone, J., Roppolo, D., Geldner, N. and Vermeer, J. E. M.** (2012). The endodermis-development  
445 and differentiation of the plant's inner skin. *Protoplasma* **249**, 433–443.
- 446 **Bhasin, H. and Hülskamp, M.** (2017). ANGUSTIFOLIA, a Plant Homolog of CtBP/BARS Localizes to Stress  
447 Granules and Regulates Their Formation. *Front. Plant Sci.* **8**, 1–17.
- 448 **Bhosale, R., Boudolf, V., Cuevas, F., Lu, R., Eekhout, T., Hu, Z., Van Isterdael, G., Lambert, G. M., Xu,  
449 F., Nowack, M. K., et al.** (2018). A Spatiotemporal DNA Endoploidy Map of the Arabidopsis Root  
450 Reveals Roles for the Endocycle in Root Development and Stress Adaptation. *Plant Cell* **30**, 2330–  
451 2351.
- 452 **Boisson-Dernier, A., Franck, C. M., Lituiev, D. S., & Grossniklaus, U.** (2015). Receptor-like cytoplasmic  
453 kinase MARIS functions downstream of CrRLK1L-dependent signaling during tip growth.  
454 *Proceedings of the National Academy of Sciences* **112**, 12211-12216.
- 455 **Bouyer, D., Geier, F., Kragler, F., Schnittger, A., Pesch, M., Wester, K., Balkunde, R., Timmer, J., Fleck,  
456 C. and Hülskamp, M.** (2008). Two-dimensional patterning by a trapping/depletion mechanism:  
457 The role of TTG1 and GL3 in Arabidopsis trichome formation. *PLoS Biol.* **6**, 1166–1177.
- 458 **Bowman, J. L., Araki, T., Arteaga-Vazquez, M. A., Berger, F., Dolan, L., Haseloff, J., ... & Kohchi, T.**  
459 (2015). The naming of names: guidelines for gene nomenclature in Marchantia. *Plant and Cell  
460 Physiol.* **57**, 257-261.
- 461 **Bramsiepe, J., Wester, K., Weinl, C., Roodbarkelari, F., Kasili, R., Larkin, J. C., Hülskamp, M. and  
462 Schnittger, A.** (2010). Endoreplication controls cell fate maintenance. *PLoS Genet.* **6**, 1–14.
- 463 **Busch, A., Deckena, M., Almeida-Trapp, M., Kopischke, S., Kock, C., Schüssler, E., Tsiantis, M.,  
464 Mithöfer, A. and Zachgo, S.** (2019). MpTCP1 controls cell proliferation and redox processes in  
465 *Marchantia polymorpha*. *New Phytol.* **224**, 1627–1641.
- 466 **Buschmann, H., Holtmannspötter, M., Borchers, A., O'Donoghue, M. T., & Zachgo, S.** (2016).  
467 Microtubule dynamics of the centrosome-like polar organizers from the basal land plant  
468 *Marchantia polymorpha*. *New Phytol.* **209**, 999-1013.
- 469 **Carella, P., Gogleva, A., Hoey, D. J., Bridgen, A. J., Stolze, S. C., Nakagami, H., & Schornack, S.** (2019).  
470 Conserved Biochemical Defenses Underpin Host Responses to Oomycete Infection in an Early-  
471 Divergent Land Plant Lineage. *Curr. Biol.* **29**, 2282-2294.
- 472 **Chiyoda, S., Ishizaki, K., Kataoka, H., Yamato, K. T. and Kohchi, T.** (2008). Direct transformation of the  
473 liverwort *Marchantia polymorpha* L. by particle bombardment using immature thalli developing  
474 from spores. *Plant Cell Rep.* **27**, 1467–1473.
- 475 **Chiyoda, S., Yamato, K.T., and Kohchi, T.** (2014) Plastid transformation of sporelings and suspension-  
476 cultured cells from the liverwort *Marchantia polymorpha* L. *Methods Mol. Biol.* **1132**, 439-47.
- 477 **Conchon, S., Cao, X., Barlowe, C. and Pelham, H. R. B.** (1999). Got1p and Sft2p: Membrane proteins  
478 involved in traffic to the Golgi complex. *EMBO J.* **18**, 3934–3946.
- 479 **De Veylder, L., Beeckman, T., Beemster, G. T. S., Krols, L., Terras, F., Landrieu, I., Van Der Schueren,  
480 E., Maes, S., Naudts, M. and Inzé, D.** (2001). Functional analysis of cyclin-dependent kinase  
481 inhibitors of Arabidopsis. *Plant Cell* **13**, 1653–1667.
- 482 **Delmans, M., Pollak, B. and Haseloff, J.** (2016). MarpoDB: An open registry for *Marchantia*  
483 *polymorpha* genetic parts. *Plant Cell Physiol.* **58**: e5(1–9).
- 484 **Eklund, D. M., Kanei, M., Flores-Sandoval, E., Ishizaki, K., Nishihama, R., Kohchi, T., ... & Bowman, J.  
485 L.** (2018). An evolutionarily conserved abscisic acid signaling pathway regulates dormancy in the  
486 liverwort *Marchantia polymorpha*. *Curr. Biol.* **28**, 3691-3699.
- 487 **Feys, B. J., Wiermer, M., Bhat, R. A., Moisan, L. J., Medina-Escobar, N., Neu, C., Cabral, A. and Parker,  
488 J. E.** (2005). Arabidopsis SENESCENCE-ASSOCIATED GENE101 stabilizes and signals within an



- 489 ENHANCED DISEASE SUSCEPTIBILITY1 complex in plant innate immunity. *Plant Cell* **17**, 2601–  
490 2613.
- 491 **Flores-Sandoval, E., Eklund, D. M., & Bowman, J. L.** (2015). A simple auxin transcriptional response  
492 system regulates multiple morphogenetic processes in the liverwort *Marchantia polymorpha*.  
493 *PLoS Genet.* **11**, e1005207.
- 494 **Franck, C. M., Westermann, J., & Boisson-Dernier, A.** (2018 A). Plant malectin-like receptor kinases:  
495 From cell wall integrity to immunity and beyond. *Ann. Rev. of Plant Biol.* **69**, 301-328.
- 496 **Franck, C. M., Westermann, J., Bürssner, S., Lentz, R., Lituiev, D. S. and Boisson-Dernier, A.** (2018 B).  
497 The protein phosphatases ATUNIS1 and ATUNIS2 regulate cell wall integrity in tip-growing cells.  
498 *Plant Cell* **30**, 1906–1923.
- 499 **Furuya, T., Hattori, K., Kimori, Y., Ishida, S., Nishihama, R., Kohchi, T. and Tsukaya, H.** (2018).  
500 ANGUSTIFOLIA contributes to the regulation of three-dimensional morphogenesis in the  
501 liverwort *Marchantia polymorpha*. *Development* **145**, dev161398.
- 502 **Geldner, N., Dénervaud-Tendon, V., Hyman, D. L., Mayer, U., Stierhof, Y. D. and Chory, J.** (2009).  
503 Rapid, combinatorial analysis of membrane compartments in intact plants with a multicolor  
504 marker set. *Plant J.* **59**, 169–178.
- 505 **Gimenez-Ibanez, S., Zamarreño, A. M., García-Mina, J. M., & Solano, R.** (2019). An Evolutionarily  
506 Ancient Immune System Governs the Interactions between *Pseudomonas syringae* and an Early-  
507 Diverging Land Plant Lineage. *Curr. Biol.* **29**, 2270-2281.
- 508 **Gould, S. J., Keller, G. A., Hosken, N., Wilkinson, J. and Subramani, S.** (1989). A conserved tripeptide  
509 sorts proteins to peroxisomes. *J. Cell Biol.* **108**, 1657–1664.
- 510 **Haas, T. J., Sliwinski, M. K., Martínez, D. E., Preuss, M., Ebine, K., Ueda, T., Nielsen, E., Odorizzi, G.  
511 and Otegui, M. S.** (2007). The Arabidopsis AAA ATPase SKD1 is involved in multivesicular  
512 endosome function and interacts with its positive regulator LYST-INTERACTING PROTEIN5. *Plant*  
513 *Cell* **19**, 1295–1312.
- 514 **Hao, L. H., Wang, W. X., Chen, C., Wang, Y. F., Liu, T., Li, X. and Shang, Z. L.** (2012). Extracellular ATP  
515 promotes stomatal opening of *Arabidopsis thaliana* through heterotrimeric G protein  $\alpha$  subunit  
516 and reactive oxygen species. *Mol. Plant* **5**, 852–864.
- 517 **Harrison, C. J.** (2017). Development and genetics in the evolution of land plant body plans.  
518 *Philosophical Transactions of the Royal Society B: Biol. Sci.* **372**, 20150490.
- 519 **Hu, C.-D., Chinenov, Y. and Kerppola, T.K.** (2002) Visualization of interactions among bZIP and Rel  
520 family proteins in living cells using bimolecular fluorescence complementation. *Mol. Cell.* **9**, 789–  
521 798.
- 522 **Ishizaki, K., Chiyoda, S., Yamato, K. T. and Kohchi, T.** (2008). Agrobacterium-mediated transformation  
523 of the haploid liverwort *Marchantia polymorpha* L., an emerging model for plant biology. *Plant*  
524 *Cell Physiol.* **49**, 1084–1091.
- 525 **Ishizaki, K., Johzuka-Hisatomi, Y., Ishida, S., Iida, S. and Kohchi, T.** (2013). Homologous recombination-  
526 mediated gene targeting in the liverwort *Marchantia polymorpha* L. *Sci. Rep.* **3**, 1–6.
- 527 **Ishizaki, K., Nishihama, R., Ueda, M., Inoue, K., Ishida, S., Nishimura, Y., ... & Kohchi, T.** (2015 A).  
528 Development of gateway binary vector series with four different selection markers for the  
529 liverwort *Marchantia polymorpha*. *PLoS One* **10**, e0138876.
- 530 **Ishizaki, K., Nishihama, R., Yamato, K. T., & Kohchi, T.** (2015 B). Molecular genetic tools and  
531 techniques for *Marchantia polymorpha* research. *Plant and Cell Physiol.* **57**, 262-270.
- 532 **Iwasaki, S., Takeda, A., Motose, H. and Watanabe, Y.** (2007). Characterization of Arabidopsis  
533 decapping proteins AtDCP1 and AtDCP2, which are essential for post-embryonic development.  
534 *FEBS Lett.* **581**, 2455–2459.

- 535 **Jakoby, M. J., Weinl, C., Pusch, S., Kuijt, S. J. H., Merkle, T., Dissmeyer, N. and Schnittger, A.** (2006).  
536 Analysis of the subcellular localization, function, and proteolytic control of the Arabidopsis cyclin-  
537 dependent kinase inhibitor ICK1/KRP1. *Plant Physiol.* **141**, 1293–1305.
- 538 **Jin, J.P., Tian, F., Yang, D.C., Meng, Y.Q., Kong, L., Luo, J.C. and Gao, G.** (2017). PlantTFDB 4.0: toward  
539 a central hub for transcription factors and regulatory interactions in plants. *Nucleic Acids*  
540 *Research* **45**, D1040-D1045.
- 541 **Jin, J.P., He, K., Tang, X., Li, Z., Lv, L., Zhao, Y., Luo, J.C., and Gao, G.** (2015). An Arabidopsis  
542 transcriptional regulatory map reveals distinct functional and evolutionary features of novel  
543 transcription factors. *Mol. Biol. and Evo.* **32**,1767-1773.
- 544 **Jin, J.P., Zhang, H., Kong, L., Gao, G. and Luo, J.C.** (2014). PlantTFDB 3.0: a portal for the functional  
545 and evolutionary study of plant transcription factors. *Nucleic Acids Research* **42**,D1182-D1187.
- 546 **Jones, V. A., & Dolan, L.** (2017). MpWIP regulates air pore complex development in the liverwort  
547 *Marchantia polymorpha*. *Development* **144**, 1472-1476.
- 548 **Jones, K., Kim, D. W., Park, J. S. and Khang, C. H.** (2016). Live-cell fluorescence imaging to investigate  
549 the dynamics of plant cell death during infection by the rice blast fungus *Magnaporthe oryzae*.  
550 *BMC Plant Biol.* **16**, 1–8.
- 551 **Kanazawa, T., Era, A., Minamino, N., Shikano, Y., Fujimoto, M., Uemura, T., ... & Kohchi, T.** (2016).  
552 SNARE molecules in *Marchantia polymorpha*: unique and conserved features of the membrane  
553 fusion machinery. *Plant and Cell Physiology* **57**, 307-324.
- 554 **Keller, G. A., Krisans, S., Gould, S. J., Sommer, J. M., Wang, C. C., Schliebs, W., Kunau, W., Brody, S.**  
555 **and Subramani, S.** (1991). Evolutionary conservation of a microbody targeting signal that targets  
556 proteins to peroxisomes, glyoxysomes, and glycosomes. *J. Cell Biol.* **114**, 893–904.
- 557 **Kim, J., Lee, H., Lee, H. N., Kim, S. H., Shin, K. D. and Chung, T.** (2013). Autophagy-related proteins are  
558 required for degradation of peroxisomes in Arabidopsis hypocotyls during seedling growth. *Plant*  
559 *Cell* **25**, 4956–4966.
- 560 **Kimura, S., & Kodama, Y.** (2016). Actin-dependence of the chloroplast cold positioning response in the  
561 liverwort *Marchantia polymorpha* L. *PeerJ.* **4**, e2513.
- 562 **Kirchhelle, C., Chow, C. M., Foucart, C., Neto, H., Stierhof, Y. D., Kalde, M., Walton, C., Fricker, M.,**  
563 **Smith, R. S., Jérusalem, A., et al.** (2016). The Specification of Geometric Edges by a Plant Rab  
564 GTPase Is an Essential Cell-Patterning Principle During Organogenesis in Arabidopsis. *Dev. Cell* **36**,  
565 386–400.
- 566 **Kirik, V., Bouyer, D., Schöbinger, U., Bechtold, N., Herzog, M., Bonneville, J. M. and Hülkamp, M.**  
567 (2001). CPR5 is involved in cell proliferation and cell death control and encodes a novel  
568 transmembrane protein. *Curr. Biol.* **11**, 1891–1895.
- 569 **Kodama, Y., & Hu, C. D.** (2012). Bimolecular fluorescence complementation (BiFC): a 5-year update  
570 and future perspectives. *Biotechniques* **53**, 285-298.
- 571 **Kondou, Y., Miyagi, Y., Morito, T., Fujihira, K., Miyauchi, W., Moriyama, A., Terasawa, T., Ishida, S.,**  
572 **Iwabuchi, K., Kubo, H., et al.** (2019). Physiological function of photoreceptor UVR8 in UV-B  
573 tolerance in the liverwort *Marchantia polymorpha*. *Planta* **249**, 1349–1364.
- 574 **Kong, X., Li, C., Zhang, F., Yu, Q., Gao, S., Zhang, M., Tian, H., Zhang, J., Yuan, X. and Ding, Z.** (2018).  
575 Ethylene promotes cadmium-induced root growth inhibition through EIN3 controlled XTH33 and  
576 LSU1 expression in Arabidopsis. *Plant Cell Environ.* **41**, 2449–2462.
- 577 **Konno, R., Tanaka, H. and Kodama, Y.** (2018). SKLPT imaging: Efficient in vivo pre-evaluation of  
578 genome-editing modules using fluorescent protein with peroxisome targeting signal. *Biochem.*  
579 *Biophys. Res. Commun.* **503**, 235–241.
- 580 **Kost, B., Spielhofer, P., & Chua, N. H.** (1998). A GFP-mouse talin fusion protein labels plant actin  
581 filaments in vivo and visualizes the actin cytoskeleton in growing pollen tubes. *The Plant J.* **16**,  
582 393-401.

- 583 **Kubota, A., Ishizaki, K., Hosaka, M. and Kohchi, T.** (2013). Efficient Agrobacterium-mediated  
584 transformation of the liverwort *Marchantia polymorpha* using regenerating thalli. *Biosci.*  
585 *Biotechnol. Biochem.* **77**, 167–172.
- 586 **Lee, Y. K., Kim, G. T., Kim, I. J., Park, J., Kwak, S. S., Choi, G. and Chung, W. II** (2006). LONGIFOLIA1  
587 and LONGIFOLIA2, two homologous genes, regulate longitudinal cell elongation in Arabidopsis.  
588 *Development* **133**, 4305–4314.
- 589 **Lind, C., Dreyer, I., López-Sanjurjo, E. J., von Meyer, K., Ishizaki, K., Kohchi, T., ... & Hedrich, R.** (2015).  
590 Stomatal guard cells co-opted an ancient ABA-dependent desiccation survival system to regulate  
591 stomatal closure. *Curr. Biol.* **25**, 928-935.
- 592 **Maldonado-Bonilla, L. D.** (2014). Composition and function of P bodies in *Arabidopsis thaliana*. *Front*  
593 *Plant Sci.* **5**, 1–11.
- 594 **Mang, H., Feng, B., Hu, Z., Boisson-Dernier, A., Franck, C. M., Meng, X., ... & Shan, L.** (2017).  
595 Differential regulation of two-tiered plant immunity and sexual reproduction by ANXUR receptor-  
596 like kinases. *Plant Cell* **29**, 3140-3156.
- 597 **Mano, S., Nishihama, R., Ishida, S., Hikino, K., Kondo, M., Nishimura, M., ... & Nakagawa, T.** (2018).  
598 Novel gateway binary vectors for rapid tripartite DNA assembly and promoter analysis with  
599 various reporters and tags in the liverwort *Marchantia polymorpha*. *PLoS One* **13**, e0204964.
- 600 **Mathur, J., Mathur, N. and Hülskamp, M.** (2002). Simultaneous visualization of peroxisomes and  
601 cytoskeletal elements Reveals Actin and Not Microtubule-Based Peroxisome Motility in Plants  
602 *Plant Physiol.* **128**, 1031–1045.
- 603 **Mathur, J., Mathur, N., Kernebeck, B. and Hülskamp, M.** (2003). Mutations in Actin-related proteins  
604 2 and 3 affect Cell Shape Development in Arabidopsis. *Plant Cell* **15**, 1632–1645.
- 605 **Minamino, N., Kanazawa, T., Era, A., Ebine, K., Nakano, A. and Ueda, T.** (2018). RAB GTPases in the  
606 Basal Land Plant *Marchantia polymorpha*. *Plant Cell Physiol.* **59**, 845–856.
- 607 **Miyazaki, S., Murata, T., Sakurai-Ozato, N., Kubo, M., Demura, T., Fukuda, H., & Hasebe, M.** (2009).  
608 ANXUR1 and 2, sister genes to FERONIA/SIRENE, are male factors for coordinated fertilization.  
609 *Curr. Biol.* **19**, 1327-1331.
- 610 **Monte, I., Ishida, S., Zamarreño, A. M., Hamberg, M., Franco-Zorrilla, J. M., García-Casado, G., ... &**  
611 **Solano, R.** (2018). Ligand-receptor co-evolution shaped the jasmonate pathway in land plants.  
612 *Nature chem. biol.* **14**, 480.
- 613 **Monte, I., Franco-Zorrilla, J. M., García-Casado, G., Zamarreño, A. M., García-Mina, J. M., Nishihama,**  
614 **R., ... & Solano, R.** (2019). A single JAZ repressor controls the jasmonate pathway in *Marchantia*  
615 *polymorpha*. *Mol. plant* **12**, 185-198.
- 616 **Morris, J. L., Puttick, M. N., Clark, J. W., Edwards, D., Kenrick, P., Pressel, S., ... & Donoghue, P. C.**  
617 (2018). The timescale of early land plant evolution. *Proceedings of the National Academy of*  
618 *Sciences* **115**, E2274-E2283.
- 619 **Motomura, K., Le, Q. T. N., Hamada, T., Kutsuna, N., Mano, S., Nishimura, M. and Watanabe, Y.**  
620 (2015). Diffuse decapping enzyme DCP2 accumulates in DCP1 foci under heat stress in  
621 *Arabidopsis thaliana*. *Plant Cell Physiol.* **56**, 107–115.
- 622 **Naito, Y., Hino, K., Bono, H. and Ui-Tei, K.** (2015). CRISPRdirect: software for designing CRISPR/Cas  
623 guide RNA with reduced off-target sites. *Bioinformatics* **31**, 1120-1123.
- 624 **Otani, K., Ishizaki, K., Nishihama, R., Takatani, S., Kohchi, T., Takahashi, T., & Motose, H.** (2018). An  
625 evolutionarily conserved NIMA-related kinase directs rhizoid tip growth in the basal land plant  
626 *Marchantia polymorpha*. *Development* **145**, dev154617.
- 627 **Peñuelas, M., Monte, I., Schweizer, F., Vallat, A., Reymond, P., García-Casado, G., ... & Solano, R.**  
628 (2019). Jasmonate-related MYC Transcription Factors are Functionally Conserved in *Marchantia*  
629 *polymorpha*. *Plant Cell* **31**, 2491-2509.

- 630 **Pesch, M., Schultheiß, I., Digiuni, S., Uhrig, J. F. and Hülskamp, M.** (2013). Mutual control of  
631 intracellular localisation of the patterning proteins AtMYC1, GL1 and TRY/CPC in Arabidopsis. *Dev.*  
632 **140**, 3456–3467.
- 633 **Proust, H., Honkanen, S., Jones, V. A., Morieri, G., Prescott, H., Kelly, S., ... & Dolan, L.** (2016). RSL  
634 class I genes controlled the development of epidermal structures in the common ancestor of land  
635 plants. *Curr. Biol.* **26**, 93-99.
- 636 **Puttick, M. N., O'Reilly, J. E., Tanner, A. R., Fleming, J. F., Clark, J., Holloway, L., ... & Donoghue, P. C.**  
637 (2017). Uncertain-tree: discriminating among competing approaches to the phylogenetic analysis  
638 of phenotype data. *Proceedings of the Royal Society B: Biological Sciences* **284**, 20162290.
- 639 **Rasmussen, J. L., Kikkert, J. R., Roy, M. K. and Sanford, J. C.** (1994). Biolistic transformation of tobacco  
640 and maize suspension cells using bacterial cells as microprojectiles. *Plant Cell Rep.* **13**, 212–217.
- 641 **Riedl, J., Crevenna, A. H., Kessenbrock, K., Yu, J. H., Neukirchen, D., Bista, M., ... & Sixt, M.** (2008).  
642 Lifeact: a versatile marker to visualize F-actin. *Nature Methods* **5**, 605-607.
- 643 **Rodríguez-Serrano, M., Romero-Puertas, M. C., Sanz-Fernández, M., Hu, J. and Sandalio, L. M.** (2016).  
644 Peroxisomes extend peroxules in a fast response to stress via a reactive oxygen species-mediated  
645 induction of the peroxin PEX11a. *Plant Physiol.* **171**, 1665–1674.
- 646 **Rotman, B., and Papermaster, B.W.** (1966). Membrane properties of living mammalian cells as studied  
647 by enzymatic hydrolysis of fluorogenic esters. *PNAS* **55**, 134-141.
- 648 **Rövekamp, M., Bowman, J. L., & Grossniklaus, U.** (2016). Marchantia MpRKD regulates the  
649 gametophyte-sporophyte transition by keeping egg cells quiescent in the absence of fertilization.  
650 *Curr. Biol.* **26**, 1782-1789.
- 651 **Saedler, R., Jakoby, M., Marin, B., Galiana-jaime, E. and Hu, M.** (2009). The cell morphogenesis gene  
652 SPIRRIG in Arabidopsis encodes a WD / BEACH domain protein. *Plant J.* **59**, 612–621.
- 653 **Sanford, J. C.** (1990). Biolistic plant transformation. *Phys. Plant.* **79**, 206-209.
- 654 **Sato, Y., Sugimoto, N., Hirai, T., Imai, A., Kubo, M., Hiwatashi, Y., Nishiyama, T. and Hasebe, M.**  
655 (2017). Cells reprogramming to stem cells inhibit the reprogramming of adjacent cells in the moss  
656 *Physcomitrella patens*. *Sci. Rep.* **7**, 1–12.
- 657 **Schapiro, A. L., Voigt, B., Jasik, J., Rosado, A., Lopez-Cobollo, R., Menzel, D., Salinas, J., Mancuso, S.,**  
658 **Valpuesta, V., Baluska, F., et al.** (2008). Arabidopsis Synaptotagmin 1 is required for the  
659 maintenance of plasma membrane integrity and cell viability. *Plant Cell* **20**, 3374–3388.
- 660 **Schindelin, J., Arganda-Carreras, I., Frise, E., Kaynig, V., Longair, M., Pietzsch, T., ... & Tinevez, J. Y.**  
661 (2012). Fiji: an open-source platform for biological-image analysis. *Nature Methods* **9**, 676-682.
- 662 **Schnittger, A., Weinl, C., Bouyer, D., Schöbinger, U. and Hülskamp, M.** (2003). Misexpression of the  
663 cyclin-dependent kinase inhibitor ICK1/KRP1 in single-celled Arabidopsis trichomes reduces  
664 endoreduplication and cell size and induces cell death. *Plant Cell* **15**, 303–315.
- 665 **Schnittger, A., and Hülskamp, M.** (2007) Whole-Mount DAPI Staining and Measurement of DNA  
666 Content in Plant Cells. *CSH Protoc.* pdb,prot4684.
- 667 **Shahriari, M., Keshavaiah, C., Scheuring, D., Sabovljevic, A., Pimpl, P., Häusler, R. E., Hülskamp, M.**  
668 **and Schellmann, S.** (2010). The AAA-type ATPase AtSKD1 contributes to vacuolar maintenance  
669 of *Arabidopsis thaliana*. *Plant J.* **64**, 71–85.
- 670 **Shaw, A. J., Szövényi, P., & Shaw, B.** (2011). Bryophyte diversity and evolution: windows into the early  
671 evolution of land plants. *American J. of Bot.* **98**, 352-369.
- 672 **Spitzer, C., Schellmann, S., Sabovljevic, A., Shahriari, M., Keshavaiah, C., Bechtold, N., Herzog, M.,**  
673 **Müller, S., Hanisch, F. G. and Hülskamp, M.** (2006). The Arabidopsis *elch* mutant reveals  
674 functions of an ESCRT components in cytokinesis. *Development* **133**, 4679–4689.
- 675 **Steffens, A., Jaegle, B., Tresch, A., Hülskamp, M. and Jakoby, M.** (2014). Processing-Body Movement  
676 in Arabidopsis depends on an interaction between Myosins and DECAPPING PROTEIN1. *Plant*  
677 *Physiol.* **164**, 1879-1892.



- 678 **Steffens, A., Bräutigam, A., Jakoby, M. and Hülskamp, M.** (2015). The BEACH Domain Protein SPIRRIG  
679 Is Essential for Arabidopsis Salt Stress Tolerance and Functions as a Regulator of Transcript  
680 Stabilization and Localization. *PLoS Biol.* **13**, e1002188.
- 681 **Steffens, A., Jakoby, M. and Hülskamp, M.** (2017). Physical, Functional and Genetic Interactions  
682 between the BEACH Domain Protein SPIRRIG and LIP5 and SKD1 and Its Role in Endosomal  
683 Trafficking to the Vacuole in Arabidopsis. *Front. Plant Sci.* **8**, 1–13.
- 684 **Sugano, S. S., Shirakawa, M., Takagi, J., Matsuda, Y., Shimada, T., Hara-Nishimura, I., & Kohchi, T.**  
685 (2014). CRISPR/Cas9-mediated targeted mutagenesis in the liverwort *Marchantia polymorpha* L.  
686 *Plant and Cell Physiol.* **55**, 475-481.
- 687 **Sugano, S.S., and Nishiyama, R.** (2018) CRISPR/Cas9-Based Genome Editing of Transcription Factor  
688 Genes in *Marchantia polymorpha*. *Methods Mol Biol.* **1830**, 109-126.
- 689 **Takano, J., Noguchi, K., Yasumori, M., Kobayashi, M., Gajdos, Z., Miwa, K., Hayashi, H., Yoneyama,  
690 T. and Fujiwara, T.** (2002). Arabidopsis boron transporter for xylem loading. *Nature* **420**, 337–  
691 340.
- 692 **Ubeda-Tomás, S., Federici, F., Casimiro, I., Beemster, G. T. S., Bhalerao, R., Swarup, R., Doerner, P.,  
693 Haseloff, J. and Bennett, M. J.** (2009). Gibberellin Signaling in the Endodermis Controls  
694 Arabidopsis Root Meristem Size. *Curr. Biol.* **19**, 1194–1199.
- 695 **Ueki, S., Lacroix, B., Krichevsky, A., Lazarowitz, S. G. and Citovsky, V.** (2009). Functional transient  
696 genetic transformation of Arabidopsis leaves by biolistic bombardment. *Nat. Protoc.* **4**, 71–77.
- 697 **Uemura, T., Ueda, T., Ohniwa, R. L., Nakano, A., Takeyasu, K. and Sato, M. H.** (2004). Systematic  
698 analysis of SNARE molecules in Arabidopsis: Dissection of the post-Golgi network in plant cells.  
699 *Cell Struct. Funct.* **29**, 49–65.
- 700 **Walter, M., Chaban, C., Schütze, K., Batistic, O., Weckermann, K., Näke, C., Blazevic, D., Grafen, C.,  
701 Schumacher, K., Oecking, C., et al.** (2004). Visualization of protein interactions in living plant cells  
702 using bimolecular fluorescence complementation. *Plant J.* **40**, 428–438.
- 703 **Wang, H., Qi, Q., Schorr, P., Cutler, A. J., Crosby, W. L. and Fowke, L. C.** (1998). ICK1, a cyclin-  
704 dependent protein kinase inhibitor from *Arabidopsis thaliana* interacts with both Cdc2a and  
705 CycD3, and its expression is induced by abscisic acid. *Plant J.* **15**, 501–510.
- 706 **Weber, C., Nover, L. and Fauth, M.** (2008). Plant stress granules and mRNA processing bodies are  
707 distinct from heat stress granules. *Plant J.* **56**, 517–530.
- 708 **Weinl, C., Marquardt, S., Kuijt, S. J. H., Nowack, M. K., Jakoby, M. J., Hülskamp, M. and Schnittger,  
709 A.** (2005). Novel functions of plant cyclin-dependent kinase inhibitors, ICK1/KRP1, can act non-  
710 cell-autonomously and inhibit entry into mitosis. *Plant Cell* **17**, 1704–1722.
- 711 **Westermann, J., Streubel, S., Franck, C. M., Lentz, R., Dolan, L., & Boisson-Dernier, A.** (2019). An  
712 Evolutionarily Conserved Receptor-like Kinases Signaling Module Controls Cell Wall Integrity  
713 During Tip Growth. *Curr. Biol.* **29**, 3899-3908.
- 714 **Xu, J. and Chua, N. H.** (2009). Arabidopsis decapping 5 is required for mRNA decapping, P-body  
715 formation, and translational repression during postembryonic development. *Plant Cell* **21**, 3270–  
716 3279.
- 717 **Xu, J., Yang, J. Y., Niu, Q. W. and Chua, N. H.** (2006). Arabidopsis DCP2, DCP1, and VARICOSE form a  
718 decapping complex required for postembryonic development. *Plant Cell* **18**, 3386–3398.
- 719 **Zhao, H., Wang, X., Zhu, D., Cui, S., Li, X., Cao, Y. and Ma, L.** (2012). A single amino acid substitution  
720 in IIIf subfamily of basic helix-loop-helix transcription factor AtMYC1 leads to trichome and root  
721 hair patterning defects by abolishing its interaction with partner proteins in Arabidopsis. *J. Biol.*  
722 *Chem.* **287**, 14109–14121.
- 723 **Zimmermann, I. M., Heim, M. A., Weisshaar, B. and Uhrig, J. F.** (2004). Comprehensive identification  
724 of *Arabidopsis thaliana* MYB transcription factors interacting with R/B-like BHLH proteins. *Plant*  
725 *J.* **40**, 22–34.

726 **FIGURE LEGENDS:**

727

728 **Fig. 1: Biolistic transformation of *Marchantia thalli*.** (A) Plant material used for the transformation,  
729 showing 2.5 weeks old thalli grown on solid Johnson's medium. Scale bars = 2 cm (left) and 5 mm  
730 (right). (B) Representative overview of transformation efficiency; arrowheads pointing at transformed  
731 cells expressing MpMRI-YFP; Scale bar = 100  $\mu$ m. (C) Schematic transformation procedure: Vectorial  
732 DNA was coupled to gold particles (1), attached to a macro-carrier (2), biolistically transferred into  
733 thallus fragments (3), plants were allowed to rest overnight (4) and the pieces expressing the construct  
734 of interest were analysed under a microscope (5).

735

736 **Fig. 2: Confirmation of known nuclear and plasma membrane markers.** (A) The Arabidopsis nuclear  
737 marker AtKRP1 localizes to the nucleus of *M. polymorpha* epidermal cells. (B) The Arabidopsis plasma  
738 membrane marker AtNPSN12 localizes to the plasma membrane in *Marchantia* epidermal cells. (C, D)  
739 The *Marchantia* plasma membrane marker MpSYP13a co-localizes with AtNPSN12. All scale bars = 20  
740  $\mu$ m. BF = bright field.

741

742 **Fig. 3: Plasma membrane markers for *Marchantia* research.** MpMRI (A), MpFER (B) and AtMRI (C) all  
743 localized to the plasma membrane of *M. polymorpha* thallus epidermal cells. All three constructs co-  
744 localized with the plasma membrane marker AtNPSN12. All scale bars = 20  $\mu$ m.

745

746 **Fig. 4: Nucleocytoplasm markers for *Marchantia* research.** Both, AtAUN1 and AtAUN2 localized to the  
747 cytoplasm and nucleus of *M. polymorpha* thallus epidermal cells, consistent with observations in *A.*  
748 *thaliana* (Franck et al., 2018). The constructs were co-bombarded with plasma membrane marker  
749 AtNPSN12. All scale bars = 20  $\mu$ m. Pictures show maximum projections of z-stack captions, hence the  
750 appearance of the 'cytoplasmic noise' signal for AtNPSN12-mcherry (see Materials and methods  
751 section for details).

752

753 **Fig. 5: Endosomal markers for *Marchantia* research.** Both, MpRAB5 (A) and MpARA6 (B) localized to  
754 punctuate intracellular structures of *M. polymorpha* thallus epidermal cells, likely representing

755 endosomes. The constructs were co-bombarded with nuclear marker AtKRP1. The endosomal markers  
756 MpRAB5 and MpARA6 also show clear co-localization (C). All scale bars = 20  $\mu$ m. Pictures show  
757 maximum projections of z-stack captions (see Materials and methods section for details).

758

759 **Fig. 6: Peroxisomal and actin filaments markers for Marchantia research.** (A) The SKL-target sequence  
760 tagged to mCherry localized to single intracellular foci of *M. polymorpha* thallus epidermal cells, likely  
761 representing peroxisomes. mCherry-SKL was co-bombarded with nuclear marker AtKRP1. The actin  
762 filament markers (B) Citrine-mTalin and (C) LifeAct-Citrine were co-bombarded with plasma membrane  
763 marker AtNPSN12-Mcherry. All scale bars = 20  $\mu$ m. Pictures show maximum projections of z-stack  
764 captions (see Materials and methods section for details).

765

766 **Fig. 7 : Golgi markers for Marchantia research.** The Arabidopsis golgi markers AtGot1p (A) and AtSYP32  
767 (B) localize to the golgi apparatus of *M. polymorpha* epidermal cells. The constructs were co-  
768 bombarded with nuclear marker AtKRP1. (C) The golgi markers AtGot1P and AtSYP32 show clear co-  
769 localization. All scale bars = 20  $\mu$ m. BF = bright field.

770

771 **Fig. 8: Marchantia p-bodies markers.** Both, AtDCP1 (A) and MpDCP1 (C) localized to intracellular dot-  
772 like structures, that likely represent p-bodies. In contrast, AtDCP2 (B) and MpDCP2 (D) localized to the  
773 cytoplasm, consistent with former observations (Motomura et al., 2014). Additionally, both, AtDCP2  
774 and MpDCP2 showed a nuclear localization, co-localizing with the nuclear signal of AtKRP1. The  
775 constructs were co-bombarded with nuclear marker AtKRP1. Scale bar = 20  $\mu$ m. Pictures show  
776 maximum projections of z-stack captions (see Materials and methods section for details).

777

778 **Fig. 9: Bimolecular fluorescent complementation assays showing interaction between MpDCP1 and**  
779 **MpDCP2.** (A): Co-transformation of split-YFP fusion constructs of MpDCP1 and MpDCP2 result in a  
780 fluorescence signal in dot-like foci, indicating protein-protein interaction in p-bodies. (B) Co-  
781 bombardment of split-fusions with MpDCP2 and the unrelated MpLIP5 protein were used as a negative  
782 control. (C) We also co-bombarded split-versions of MpDCP1 and unrelated AtMYC1, which also led to  
783 the absence of any fluorescence signal. The constructs were co-bombarded with nuclear marker



784 AtKRP1. Scale bar = 20  $\mu\text{m}$ . Pictures show maximum projections of z-stack captions (see Materials and  
785 methods section for details). See also Fig. S2 for other controls.

786

787 **Fig. 10: Fluorescein diacetate staining of different *M. polymorpha* cell types.** (A) Whole-thallus  
788 staining, scale bar = 100  $\mu\text{m}$ , with close-up captures of (B) a distal thallus fragment, scale bar = 30  $\mu\text{m}$ ,  
789 and (C) a meristematically active apical notch, scale bar = 30  $\mu\text{m}$ . All three images show localization of  
790 FDA to the cytoplasm, as contrasted by absence of FDA-specific fluorescence in the vacuole and  
791 autofluorescent (AF) chloroplasts. Pictures show maximum projections of z-stack captions (see  
792 Materials and methods section for details). (D) FDA staining of a Tak-1 rhizoid of a 5 days-old  
793 gemmaling. BF = bright field. Scale bar = 50  $\mu\text{m}$ .

794

795 **Fig. 11. Propidium iodide staining of different *M. polymorpha* cell types.** Propidium iodide (PI)  
796 staining of Tak-1 rhizoids of a 2 days old gemma, staining the cell wall of both thallus epidermal cells  
797 (A; Pictures show maximum projections of z-stack) and rhizoids (B). Scale bars = 100  $\mu\text{m}$  (A) and 50  $\mu\text{m}$   
798 (B). BF = bright field. AF = Autofluorescence (detected at an emission of 680 – 700 nm).

799

800 **Fig. 12. FM4-64 staining of *M. polymorpha* thallus epidermal cells.** (A) FM4-64 staining of a 2 days old  
801 Tak-1 gemmaling, staining the plasma membrane of thallus epidermal cells. (B) Co-staining of FM4-64  
802 and FDA showing opposing plasma membrane- and cytoplasm-localized fluorescence signal. BF =  
803 bright field. FDA = Fluorescein-diacetate. All scale bars = 100  $\mu\text{m}$ .

804

805 **Fig. S1: Co-expression of MLRs and MRI with single or triple tags in *Marchantia* epidermal cells.** (A)  
806 and (B) Arabidopsis MLRs fused to single fluorescent tag are not expressed. (C) and (D) the 3xCitrine  
807 tag leads MLRs to localize to the cytoplasm. (E) the 3xCitrine tag leads to normal cytosolic and plasma  
808 membrane localization of MpMRI. Pictures show maximum projections of z-stack captions (see  
809 Materials and methods section for details). Scale bar = 20  $\mu\text{m}$ .

810

811 **Fig. S2: Bimolecular fluorescent complementation assay quality controls.** (A): The functionality of the  
812 negative control MpLIP5 was confirmed via co-bombardment of split-versions of MpLIP5 and the  
813 Marchantia homolog of the known Arabidopsis LIP5 interactor MpSKD1, showing a clear protein  
814 interaction in dot-like foci. (B): Split-YFP fusion constructs of AtMYC1 and AtTTG1, known interactors,  
815 were co-bombarded and shown to physically interact in *M. polymorpha* thallus epidermal cells,  
816 supporting the functionality of AtMYC1-YFP<sub>N</sub>. The constructs were co-bombarded with nuclear marker  
817 AtKRP1. Scale bar = 20 μm. Pictures show maximum projections of z-stack captions (see Materials and  
818 methods section for details).

819

820 **Fig. S3: Nuclei of *M. polymorpha* cannot be readily stained with DAPI.** (A) DAPI staining of Tak-1  
821 epidermal cells of a 4 days-old gemmaling. (B) DAPI staining of leaf epidermal cells of a 2 weeks old *A.*  
822 *thaliana* plant. Note the stained nuclei. All scale bars = 50 μm.

823

824 **Video S1: Growing rhizoids stained with propidium iodide.**

825

**Tab. 1: Important Marchantia resources.**

| <b>GENE and GENOME DATABASES</b>                                                                                                         |                                                                                                                                                                 |                                                                                       |
|------------------------------------------------------------------------------------------------------------------------------------------|-----------------------------------------------------------------------------------------------------------------------------------------------------------------|---------------------------------------------------------------------------------------|
| <b>Resource/method</b>                                                                                                                   | <b>Link</b>                                                                                                                                                     | <b>Reference</b>                                                                      |
| Marchantia genome sequence and database                                                                                                  | <a href="http://marchantia.info/">http://marchantia.info/</a>                                                                                                   | Bowman et al., 2017                                                                   |
| Marchantia entry on Phytozome (including BLAST and Genome Browser)                                                                       | <a href="https://phytozome.jgi.doe.gov/pz/portal.html#!info?alias=Org_Mpolymorpha">https://phytozome.jgi.doe.gov/pz/portal.html#!info?alias=Org_Mpolymorpha</a> | Bowman et al., 2017                                                                   |
| Marchantia chloroplast genome studies                                                                                                    |                                                                                                                                                                 | Ohyama et al., 1988, Umesono et al., 1988, Fukuzawa et al., 1988, Kohchi et al., 1988 |
| MarpoDB : gene-centric database for <i>Marchantia polymorpha</i> genetic parts for purposes of genetic engineering and synthetic biology | <a href="http://marpodb.io/query">http://marpodb.io/query</a>                                                                                                   | Delmans et al., 2016                                                                  |
| PlantTFDB : Plant Transcription Factor Database                                                                                          | <a href="http://planttfdb.cbi.pku.edu.cn/index.php?sp=Mpo">http://planttfdb.cbi.pku.edu.cn/index.php?sp=Mpo</a>                                                 | Jin et al., 2017<br>Jin et al., 2015<br>Jin et al., 2014                              |
| <b>TRANSIENT and STABLE GENETIC MODIFICATION</b>                                                                                         |                                                                                                                                                                 |                                                                                       |
| Homologous recombination-mediated genome editing                                                                                         |                                                                                                                                                                 | Ishizaki et al., 2013                                                                 |
| Stable Agrobacterium-mediated thallus transformation                                                                                     |                                                                                                                                                                 | Kubota et al., 2013                                                                   |
| Stable Agrobacterium-mediated sporeling transformation                                                                                   |                                                                                                                                                                 | Ishizaki et al., 2008                                                                 |
| Design of Gateway-compatible vectors for expression in Marchantia                                                                        |                                                                                                                                                                 | Ishizaki et al., 2015 (A); Mano et al., 2018                                          |
| CRISPR-Cas-based genome editing                                                                                                          |                                                                                                                                                                 | Sugano et al., 2014, Sugano et al., 2018                                              |
| CRISPRdirect target search                                                                                                               | <a href="https://crispr.dbcls.jp/">https://crispr.dbcls.jp/</a>                                                                                                 | Naito et al., 2015                                                                    |
| Stable biolistic thallus transformation                                                                                                  |                                                                                                                                                                 | Chiyoda et al., 2008                                                                  |
| Comprehensive catalogue of fluorescent cell compartment markers                                                                          |                                                                                                                                                                 | This study                                                                            |
| Protein-protein interaction studies via BiFC                                                                                             |                                                                                                                                                                 | This study                                                                            |

| <b>CELLULAR STAINING TECHNIQUES</b>                                                 |  |                                                                                                               |
|-------------------------------------------------------------------------------------|--|---------------------------------------------------------------------------------------------------------------|
| FM4-64 staining of epidermal cells and rhizoids                                     |  | Kato et al., 2017 (gemmae cups); This study (whole thallus and rhizoids)                                      |
| FM1-43 staining of epidermal cells                                                  |  | Minamino et al., 2017                                                                                         |
| PI staining of thallus epidermal cells and rhizoids                                 |  | Fixed cells: Buschmann et al., 2015; Rövekamp et al., 2016<br>Living cells: Jones and Dolan, 2017; this study |
| DAPI staining of epidermal cells                                                    |  | Kondue et al., 2019; this study                                                                               |
| FDA staining of thallus epidermal cells and rhizoids                                |  | This study                                                                                                    |
| <b>FURTHER RESOURCES</b>                                                            |  |                                                                                                               |
| Expressed sequence tags (EST) sequencing                                            |  | Nagai et al, 1999; Nishiyama et al., 2000                                                                     |
| RNA sequencing of the gametophyte transcriptome                                     |  | Sharma et al., 2014                                                                                           |
| 3D imaging using micro-computed tomography and mathematical image-processing method |  | Furuya et al., 2019                                                                                           |
| Guidelines for Marchantia gene nomenclature                                         |  | Bowman et al., 2015                                                                                           |

**Tab. S1: Comprehensive list of all marker constructs used for biolistic transformation.** The list includes their origin (referenced publication or own generation), as well as the oligonucleotide sequences used as primers for amplification of new marker gene CDS. GW = Gateway-compatible cassette.

| Construct                             | Generation / origin                                                                                                                                                                                                                                | Primers used for amplification of marker gene CDS                                                                       |
|---------------------------------------|----------------------------------------------------------------------------------------------------------------------------------------------------------------------------------------------------------------------------------------------------|-------------------------------------------------------------------------------------------------------------------------|
| <i>proMpEF1α::Lifeactin-Citrine</i>   | Kimura and Kodama, 2016                                                                                                                                                                                                                            | -                                                                                                                       |
| <i>pro35S::AtAUN1-YFP</i>             | AtAUN1 CDS from Franck et al., 2018 remobilized into <i>pro35S::GW-YFP</i>                                                                                                                                                                         | -                                                                                                                       |
| <i>pro35S::AtAUN2-YFP</i>             | AtAUN2 CDS from Franck et al., 2018 remobilized into <i>pro35S::GW-YFP</i>                                                                                                                                                                         | -                                                                                                                       |
| <i>pro35S::AtDCP1-mCherry</i>         | Cloning of CDS in Steffens et al., 2015 remobilized into pAUBERGINE (M. Jakoby, GenBank ID: FR695418), kindly provided by A. Steffens                                                                                                              | -                                                                                                                       |
| <i>pro35S::AtKRP1-CFP</i>             | Cloning of CDS in Weini et al., 2005 remobilized into pEXSG-CFP (Feys et al., 2005), kindly provided by M. Jakoby                                                                                                                                  | -                                                                                                                       |
| <i>pro35S::AtMRI-YFP</i>              | CDS from Boisson-Dernier et al., 2015 remobilized into <i>pro35S::GW-YFP</i>                                                                                                                                                                       | -                                                                                                                       |
| <i>pro35S::AtMYC1-YFP<sub>N</sub></i> | Cloning of CDS in Pesch et al., 2013, remobilized into pSPYNE (Walter et al., 2004), kindly provided by L. Stephan                                                                                                                                 | -                                                                                                                       |
| <i>pro35S::AtNPSN12-mCherry</i>       | Cloning procedure as described in Steffens et al., 2014; CDS amplified with primers containing attB sites on pUNI clone U60291 recombined in pDONR207 and introduced into pAMARENA (M. Jakoby, GenBank ID: FR695418), kindly provided by M. Jakoby | -                                                                                                                       |
| <i>pro35S::AtTTG1-YFP<sub>C</sub></i> | Cloning of CDS in Bouyer et al., 2008, remobilized into pSPYCE (Walter et al., 2004), kindly provided by L. Stephan                                                                                                                                | -                                                                                                                       |
| <i>pro35S::Citrine-mTalin</i>         | Kimura and Kodama, 2016                                                                                                                                                                                                                            | -                                                                                                                       |
| <i>pro35S::mCherry-AtDCP2</i>         | Cloning of CDS in Steffens et al., 2015 remobilized into pAMARENA (M. Jakoby, GenBank ID: FR695418), kindly provided by A. Steffens                                                                                                                | -                                                                                                                       |
| <i>pro35S::mCherry-MpRAB5</i>         | this study; CDS introduced into pAMARENA (M. Jakoby, GenBank ID: FR695418)                                                                                                                                                                         | GGGGACAAGTTTGTACAAAAAAGCAGGCTCAATGGCCACCGCGGAACGAA;<br>GGGGACCACTTTGTACAAGAAAGCTGGGTATCMGACGCAGCACATGCTTGATT            |
| <i>pro35S::MpARA6-YFP</i>             | this study; CDS introduced into pEXSG-YFP (Feys et al., 2005)                                                                                                                                                                                      | GGGGACAAGTTTGTACAAAAAAGCAGGCTCAATGGTTGTGCTGCCTCAGC;<br>GGGGACCACTTTGTACAAGAAAGCTGGGTATCMAGCTTCTGGTTGGCTGTC              |
| <i>pro35S::mCherry-SKL</i>            | SKL motif introduced into pAMARENA (M. Jakoby, GenBank ID: FR695418), kindly provided by M. Jakoby                                                                                                                                                 | -                                                                                                                       |
| <i>pro35S::mCitrine-MpSYP13a</i>      | Kanazawa et al., 2015; received from Clement Champion, Prof. Liam Dolan Lab                                                                                                                                                                        | -                                                                                                                       |
| <i>pro35S::MpDCP1-YFP</i>             | this study; CDS introduced into pEXSG-YFP (Feys et al., 2005)                                                                                                                                                                                      | GGGGACAAGTTTGTACAAAAAAGCAGGCTCAATGGCACAAAATGGCAAGCCGATGC;<br>GGGGACCACTTTGTACAAGAAAGCTGGGTATCMTGTTGAATGTGCATTGAGCATCTCC |
| <i>pro35S::MpDCP2-YFP</i>             | this study; CDS introduced into pEXSG-YFP (Feys et al., 2005)                                                                                                                                                                                      | GGGGACAAGTTTGTACAAAAAAGCAGGCTCAATGTCGGCAACGCGCTGC;<br>GGGGACCACTTTGTACAAGAAAGCTGGGTATCMGACTTCCAACCTTTGTATTATGCTT        |

|                                                  |                                                                                                                                                                                                                                            |                                                                                                                          |
|--------------------------------------------------|--------------------------------------------------------------------------------------------------------------------------------------------------------------------------------------------------------------------------------------------|--------------------------------------------------------------------------------------------------------------------------|
| <i>pro35S::MpFER-YFP</i>                         | this study; CDS containing GW-compatible attB1/2-sites, cloned into GW entry vector and introduced into <i>pro35S::GW-YFP</i>                                                                                                              | GGGGACAAGTTTGTACAAAAAAGCAGGCTTAATGAGCGTTCCTGTTT;<br>GGGGACCACCTTTGTACAAGAAAGCTGGGTAACTTCTTGAGGGTTCA                      |
| <i>pro35S::MpMRI-YFP</i>                         | MpMRI CDS from Westermann et al., 2019 remobilized into <i>pro35S::GW-YFP</i>                                                                                                                                                              | -                                                                                                                        |
| <i>pro35S::YFP<sub>C</sub>-MpDCP1</i>            | this study; CDS introduced into pCL113 (donated by J.F. Uhrig, unpublished data)                                                                                                                                                           | GGGGACAAGTTTGTACAAAAAAGCAGGCTCAATGGCACAAAATGGCAAGCCGATGC;<br>GGGGACCACCTTTGTACAAGAAAGCTGGGTATCMTGTTGAATGTGCATTGAGCATCTCC |
| <i>pro35S::YFP<sub>C</sub>-MpLIP5</i>            | this study; CDS introduced into pCL113 (donated by J.F. Uhrig, unpublished data)                                                                                                                                                           | GGGGACAAGTTTGTACAAAAAAGCAGGCTCAATGGGGAGACTGCGGATCCGAAGA;<br>GGGGACCACCTTTGTACAAGAAAGCTGGGTATCMGTGAGCTTGTGATGAAGAAGAGGTC  |
| <i>pro35S::YFP<sub>N</sub>-MpDCP2</i>            | this study; CDS introduced into pCL112 (donated by J.F. Uhrig, unpublished data)                                                                                                                                                           | GGGGACAAGTTTGTACAAAAAAGCAGGCTCAATGCCGCAACGCGCTGC;<br>GGGGACCACCTTTGTACAAGAAAGCTGGGTATCMGACTTCAACTTTTGTATTATGCTT          |
| <i>pro35S::YFP<sub>N</sub>-MpSKD1</i>            | this study; CDS introduced into pCL112 (donated by J.F. Uhrig, unpublished data)                                                                                                                                                           | GGGGACAAGTTTGTACAAAAAAGCAGGCTCAATGTACAGCAATTTCAAGGA<br>GGGGACCACCTTTGTACAAGAAAGCTGGGTATCMACCTCTCAACAAATTCAC              |
| <i>pUBQ10::YFP-AtSYP32 / pro35S::CFP-AtSYP32</i> | Cloning procedure as described in Steffens et al., 2014; CDS amplified with primers containing attB sites on pUNI clone U20852, recombined in pDONR207 and introduced into pENSG-CFP/YFP (Feys et al., 2005), kindly provided by M. Jakoby | -                                                                                                                        |
| <i>pUBQ10::YFP-AtGot1p homolog</i>               | Cloning procedure as described in Steffens et al., 2014; CDS amplified with primers containing attB sites on pUNI clone U63080 recombined in pDONR207 and introduced into pENSG-YFP (Feys et al., 2005), kindly provided by M. Jakoby      | -                                                                                                                        |

**Tab. S2: Excitation and captured emission wavelengths used for analysis of fluorescent markers.**

| Fluorophore | Excitation | Captured Emission |
|-------------|------------|-------------------|
| CFP         | 458 nm     | 470 nm – 480 nm   |
| YFP         | 514 nm     | 524 nm – 530 nm   |
| mCherry     | 561 nm     | 607 nm – 618 nm   |
| FDA         | 514 nm     | 500 nm – 540 nm   |
| PI          | 561 nm     | 610 nm – 630 nm   |
| DAPI        | 405 nm     | 450 nm – 470 nm   |

**Tab. S3: Quantification of co-bombardment efficiency in *M. polymorpha* biolistic transformation.** Data from 9 independent co-transformation events of marker proteins used in this study. Scans of at least two transformed cells were used for the quantification.

| Cells expressing both marker proteins | Total number of transformed cells | Efficiency of co-transformation [%] |
|---------------------------------------|-----------------------------------|-------------------------------------|
| 2                                     | 2                                 | 100                                 |
| 8                                     | 12                                | 67                                  |
| 2                                     | 2                                 | 100                                 |
| 1                                     | 2                                 | 50                                  |
| 2                                     | 2                                 | 100                                 |
| 2                                     | 2                                 | 100                                 |
| 3                                     | 3                                 | 100                                 |
| 1                                     | 2                                 | 50                                  |
| 1                                     | 2                                 | 50                                  |
| 5                                     | 8                                 | 63                                  |
| 4                                     | 5                                 | 80                                  |
| 1                                     | 2                                 | 50                                  |
| 1                                     | 2                                 | 50                                  |
| 3                                     | 3                                 | 100                                 |
| 4                                     | 6                                 | 67                                  |
| 7                                     | 7                                 | 100                                 |
| 1                                     | 2                                 | 50                                  |
| 2                                     | 2                                 | 100                                 |
| 1                                     | 2                                 | 50                                  |
| 1                                     | 2                                 | 50                                  |
| 3                                     | 4                                 | 75                                  |
| 2                                     | 2                                 | 100                                 |
| 3                                     | 5                                 | 60                                  |
| <b>SUM: 60</b>                        | <b>SUM: 81</b>                    | <b>Average: 74</b>                  |
|                                       |                                   | SD: 23                              |



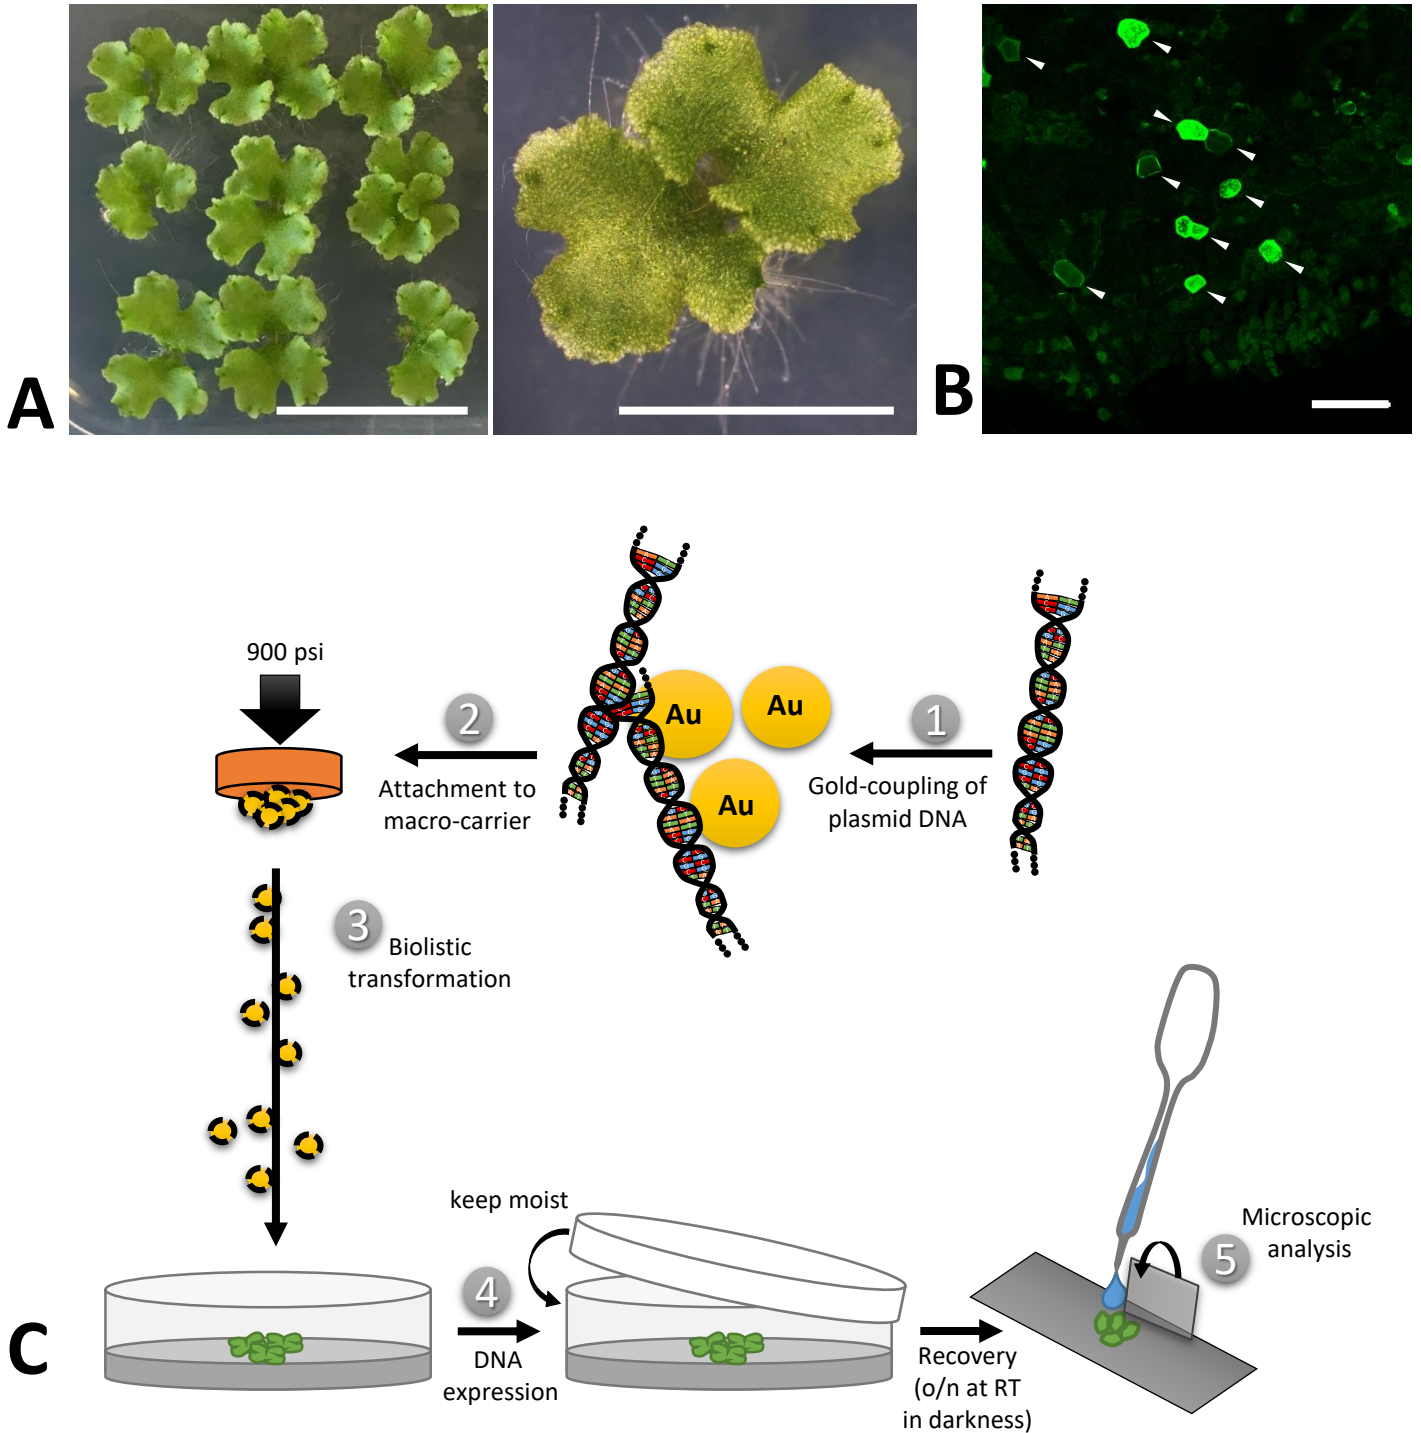

**Fig. 1: Biolistic transformation of *Marchantia thalli*.** (A) Plant material used for the transformation, showing 2.5 weeks old thalli grown on solid Johnson's medium. Scale bars = 2 cm (left) and 5 mm (right). (B) Representative overview of transformation efficiency; arrowheads pointing at transformed cells expressing MpMRI-YFP; Scale bar = 100  $\mu$ m. (C) Schematic transformation procedure: Vectorial DNA was coupled to gold particles (1), attached to a macro-carrier (2), biolistically transferred into thallus fragments (3), plants were allowed to rest overnight (4) and the pieces expressing the construct of interest were analysed under a microscope (5).

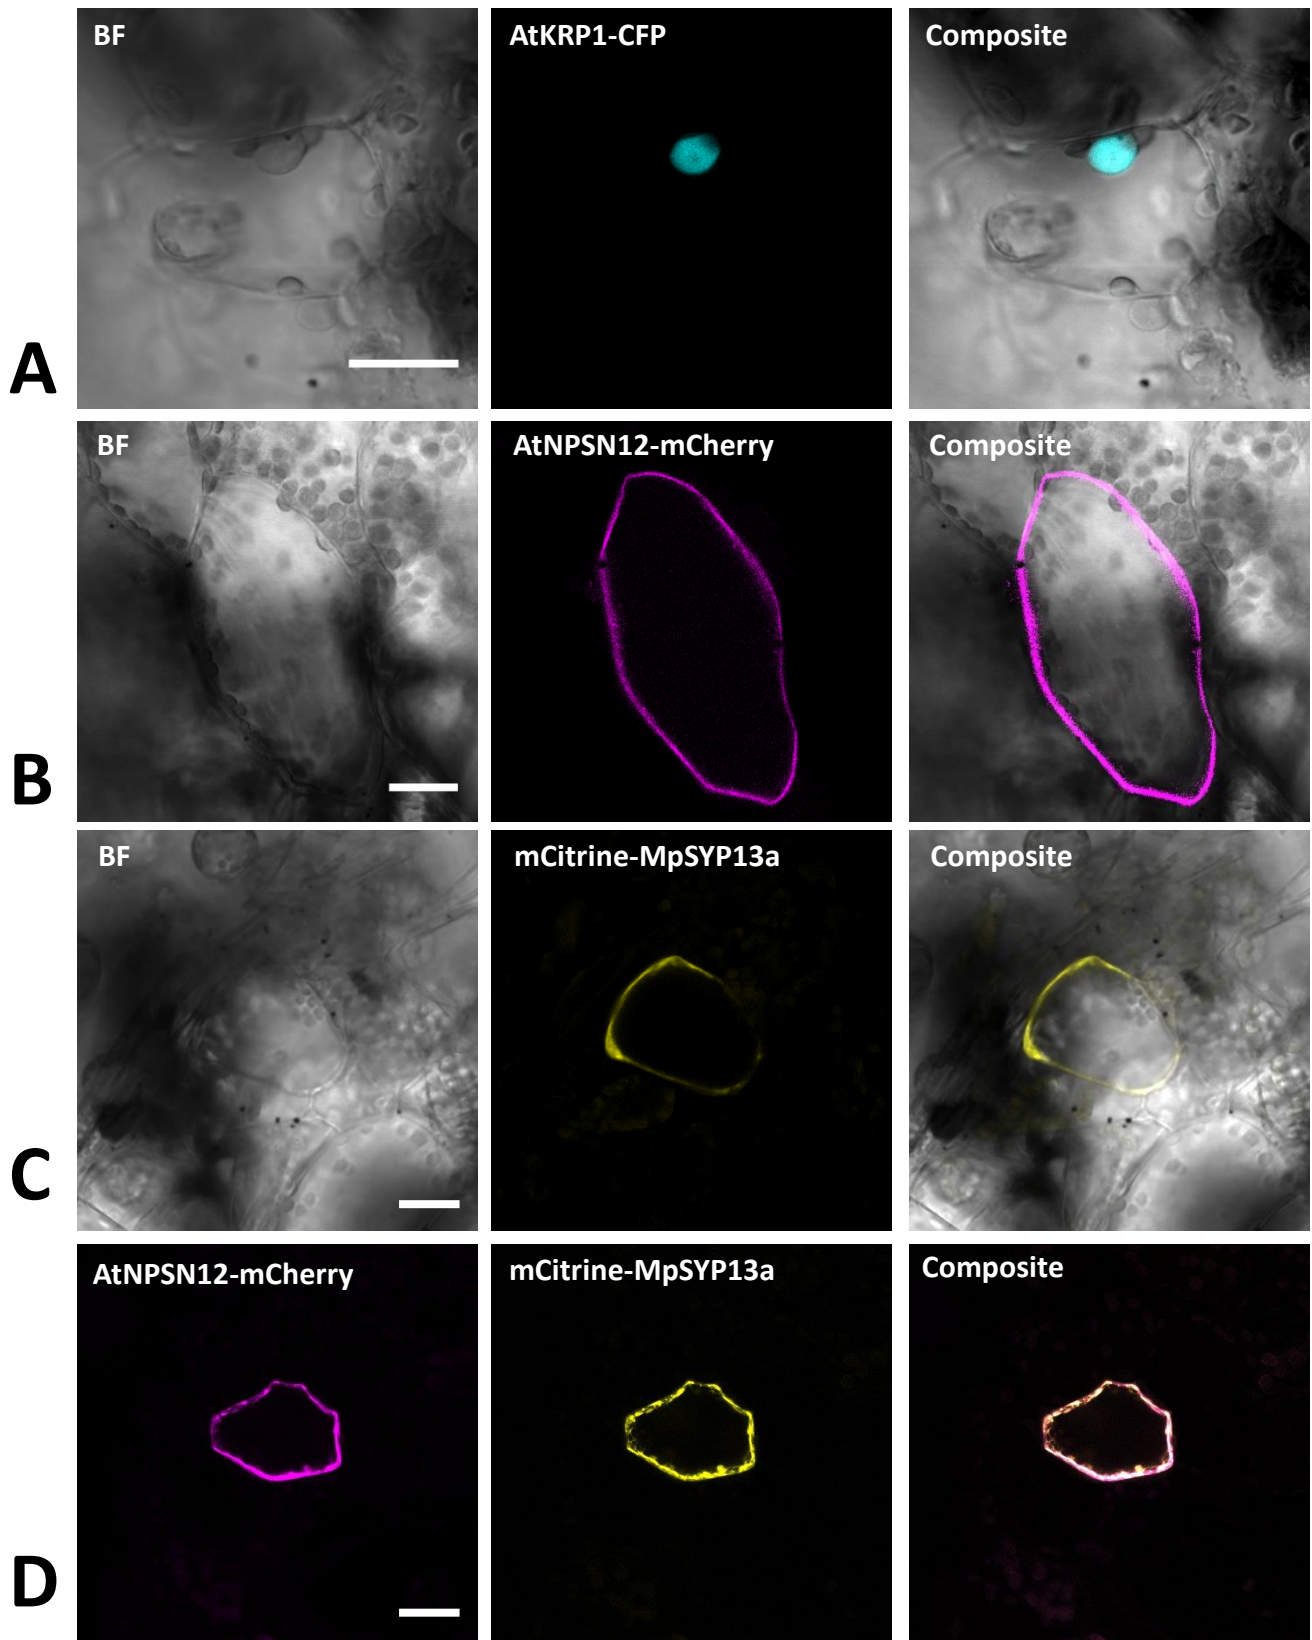

**Fig. 2: Confirmation of known nuclear and plasma membrane markers.** (A) The Arabidopsis nuclear marker AtKRP1 localizes to the nucleus of *M. polymorpha* epidermal cells. (B) The Arabidopsis plasma membrane marker AtNPSN12 localizes to the plasma membrane in *Marchantia* epidermal cells. (C, D) The *Marchantia* plasma membrane marker MpSYP13a co-localizes with AtNPSN12. All scale bars = 20  $\mu\text{m}$ . BF = bright field.

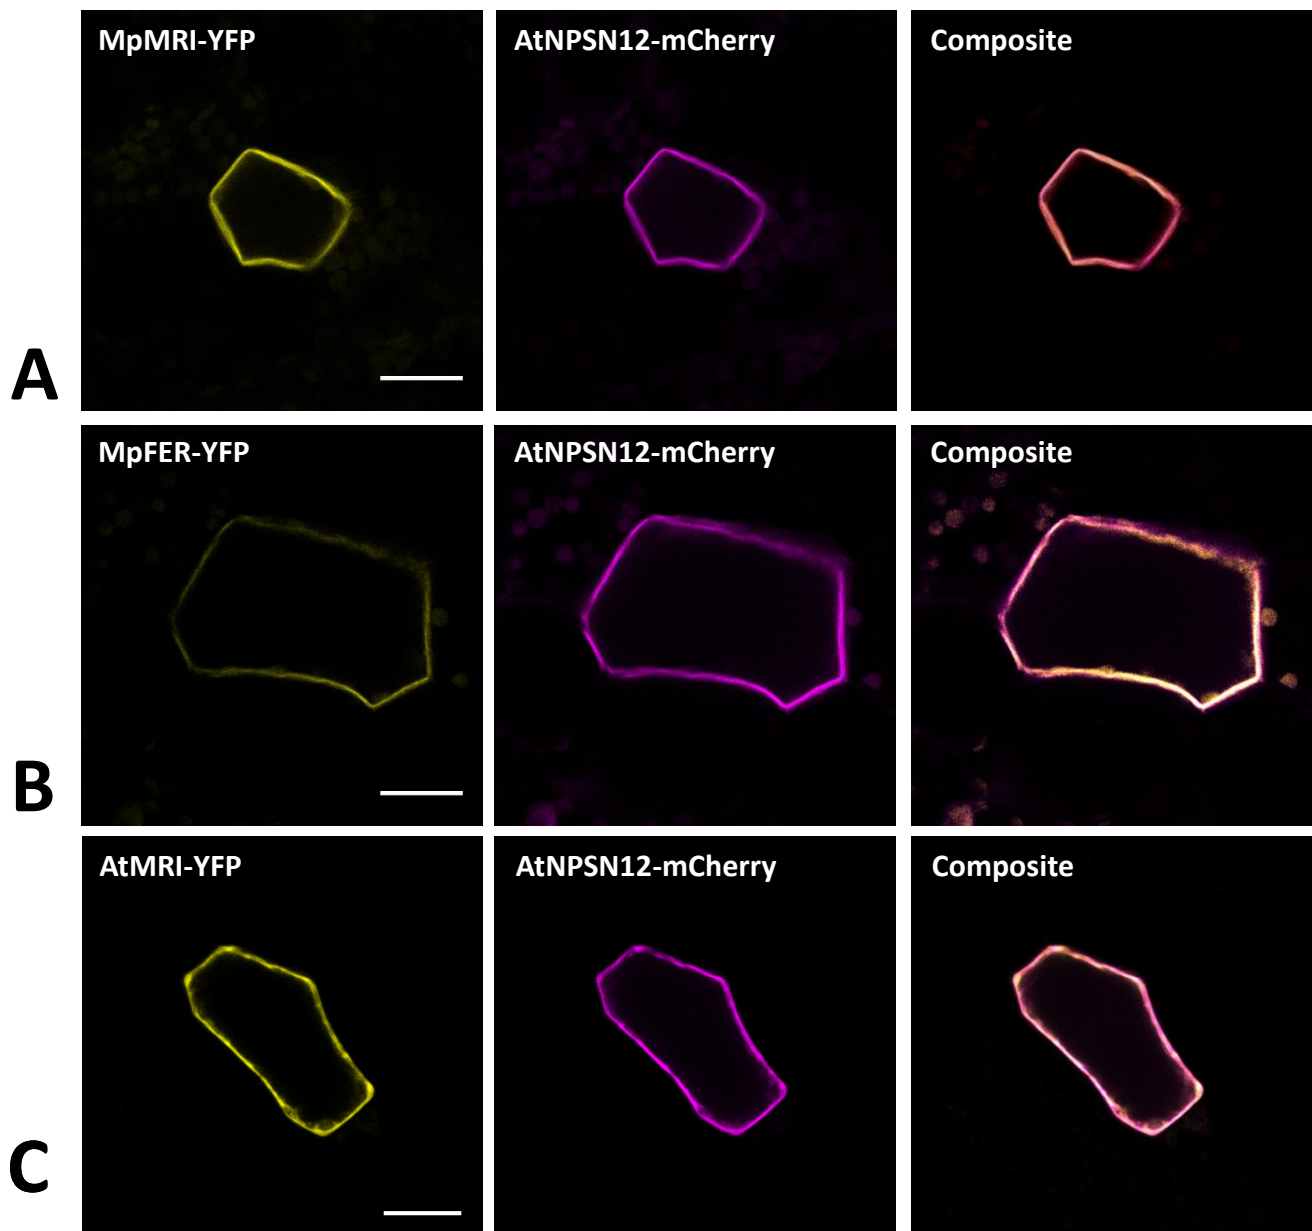

**Fig. 3: Plasma membrane markers for Marchantia research.** MpMRI (A), MpFER (B) and AtMRI (C) all localized to the plasma membrane of *M. polymorpha* thallus epidermal cells. All three constructs co-localized with the plasma membrane marker AtNPSN12. All scale bars = 20  $\mu$ m.

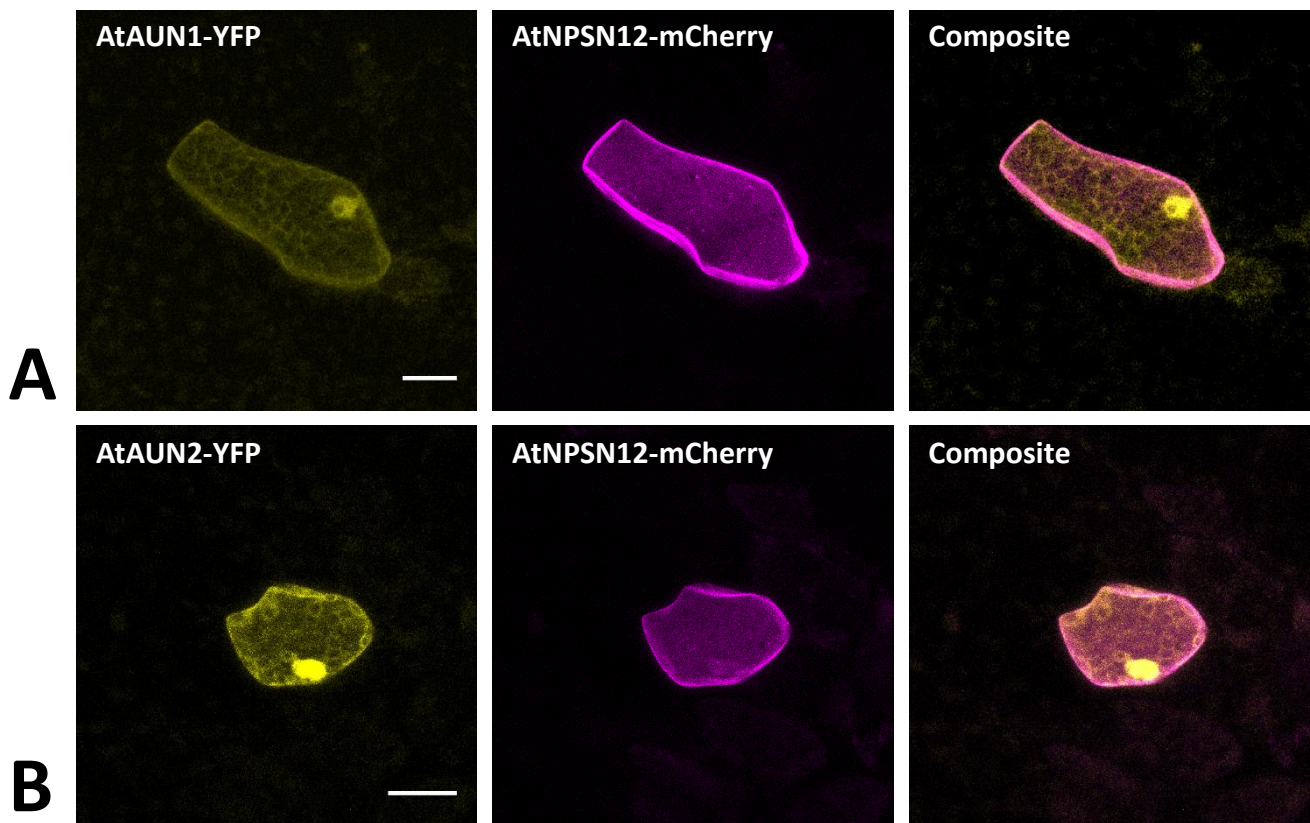

**Fig. 4: Nucleocytoplasm markers for Marchantia research.** Both, AtAUN1 and AtAUN2 localized to the cytoplasm and nucleus of *M. polymorpha* thallus epidermal cells, consistent with observations in *A. thaliana* (Franck et al., 2018). The constructs were co-bombarded with plasma membrane marker AtNPSN12. All scale bars = 20  $\mu\text{m}$ . Pictures show maximum projections of z-stack captions, hence the appearance of the 'cytoplasmic noise' signal for AtNPSN12-mcherry (see Materials and methods section for details).



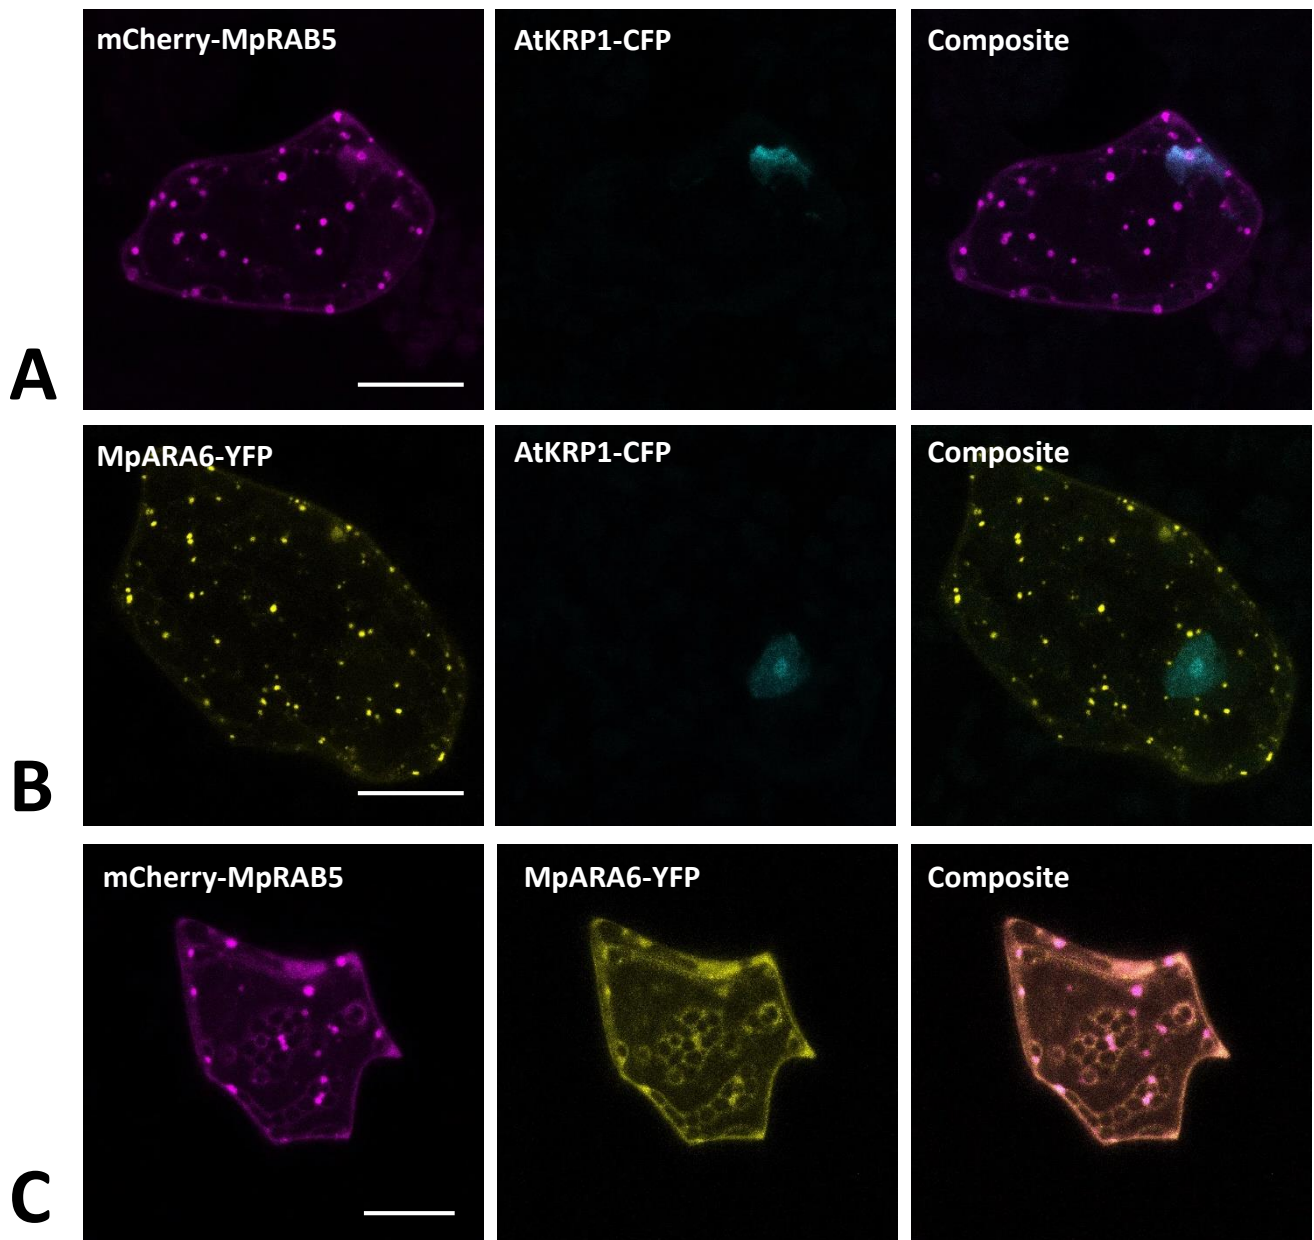

**Fig. 5: Endosomal markers for Marchantia research.** Both, MpRAB5 (A) and MpARA6 (B) localized to punctuate intracellular structures of *M. polymorpha* thallus epidermal cells, likely representing endosomes. The constructs were co-bombarded with nuclear marker AtKRP1. The endosomal markers MpRAB5 and MpARA6 also show clear co-localization (C). All scale bars = 20  $\mu$ m. Pictures show maximum projections of z-stack captions (see Materials and methods section for details).

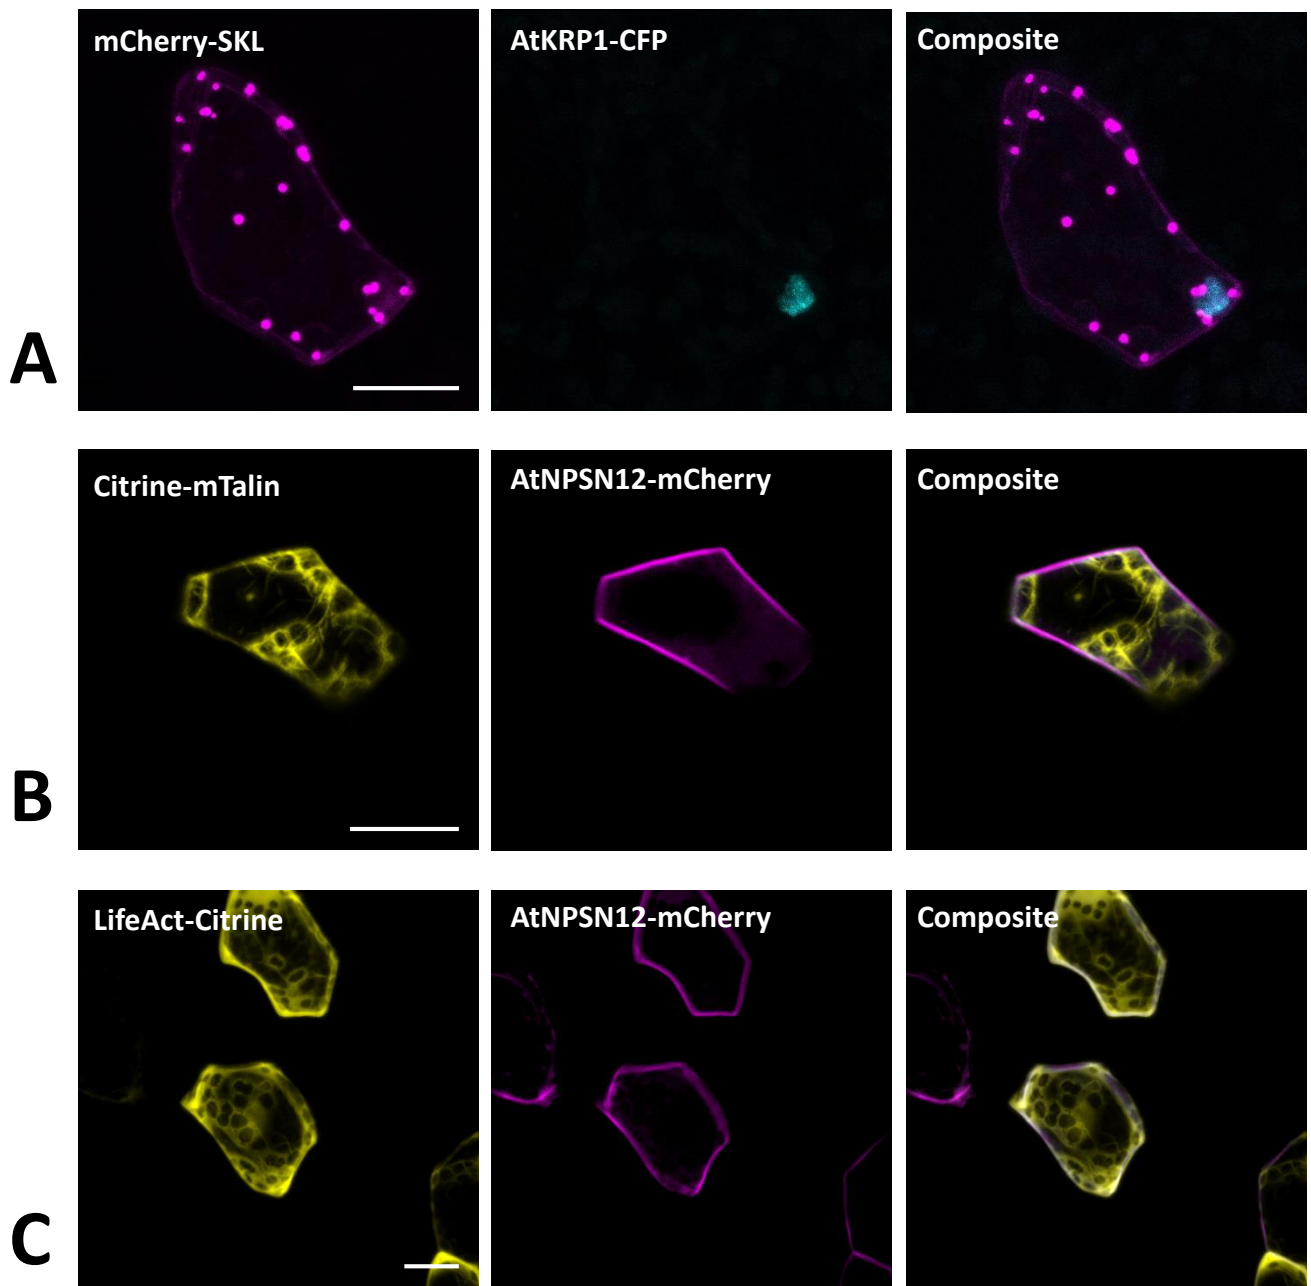

**Fig. 6: Peroxisomal and actin filaments markers for Marchantia research.** (A) The SKL-target sequence tagged to mCherry localized to single intracellular foci of *M. polymorpha* thallus epidermal cells, likely representing peroxisomes. mCherry-SKL was co-bombarded with nuclear marker AtKRP1. The actin filament markers (B) Citrine-mTalin and (C) LifeAct-Citrine were co-bombarded with plasma membrane marker AtNPSN12-Mcherry. All scale bars = 20  $\mu\text{m}$ . Pictures show maximum projections of z-stack captions (see Materials and methods section for details).

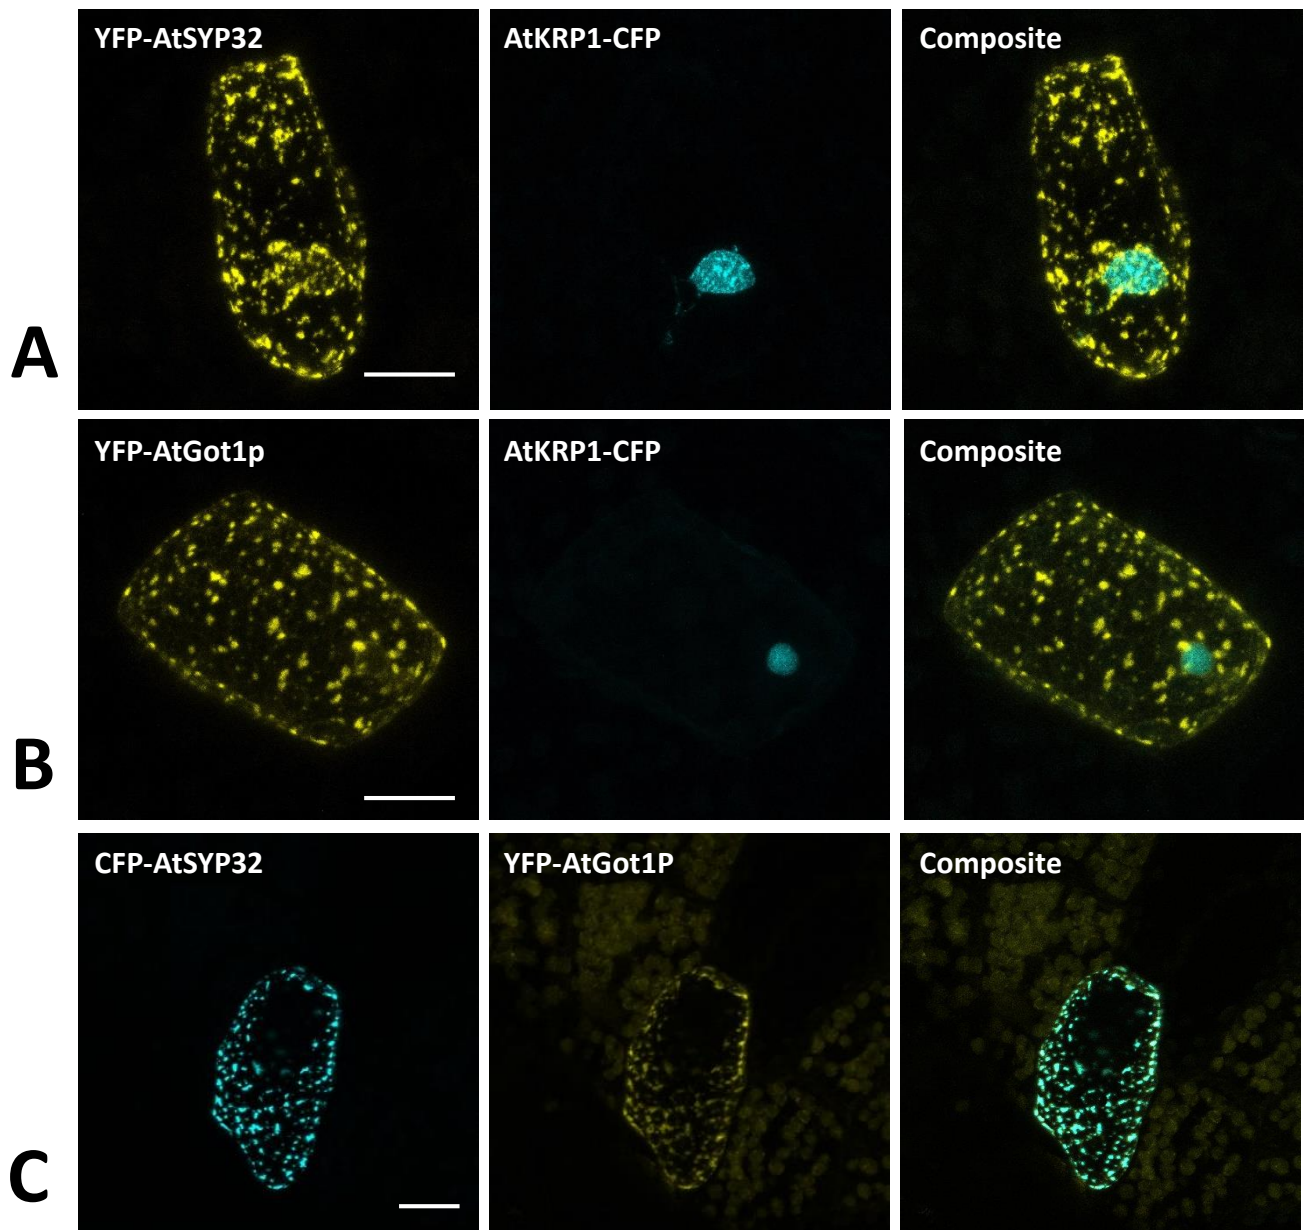

**Fig. 7 : Golgi markers for Marchantia research.** The Arabidopsis golgi markers AtGot1p (A) and AtSYP32 (B) localize to the golgi apparatus of *M. polymorpha* epidermal cells. The constructs were co-bombarded with nuclear marker AtKRP1. (C) The golgi markers AtGot1P and AtSYP32 show clear co-localization. All scale bars = 20  $\mu$ m. BF = bright field.



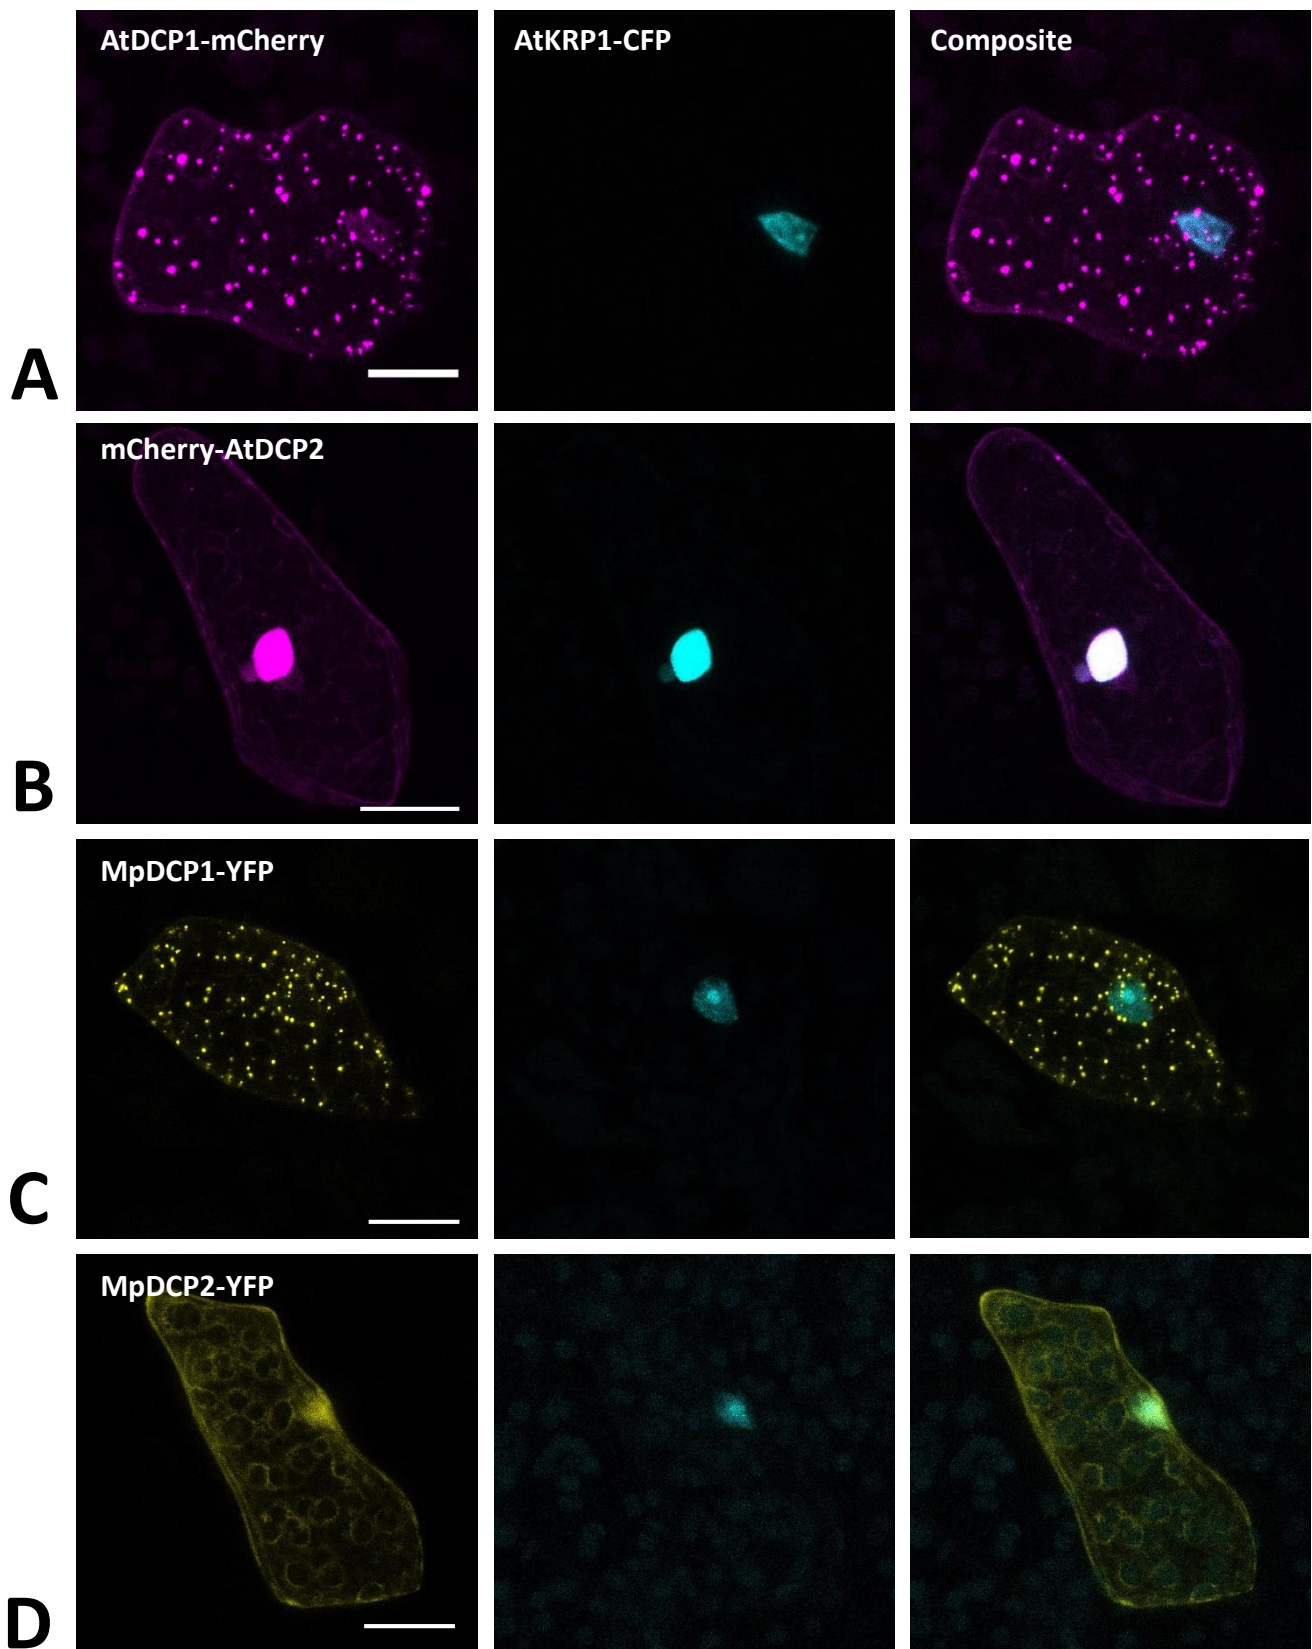

**Fig. 8: Marchantia p-bodies markers.** Both, AtDCP1 (A) and MpDCP1 (C) localized to intracellular dot-like structures, that likely represent p-bodies. In contrast, AtDCP2 (B) and MpDCP2 (D) localized to the cytoplasm, consistent with former observations (Motomura et al., 2014). Additionally, both, AtDCP2 and MpDCP2 showed a nuclear localization, co-localizing with the nuclear signal of AtKRP1. The constructs were co-bombarded with nuclear marker AtKRP1. Scale bar = 20  $\mu$ m. Pictures show maximum projections of z-stack captions (see Materials and methods section for details).



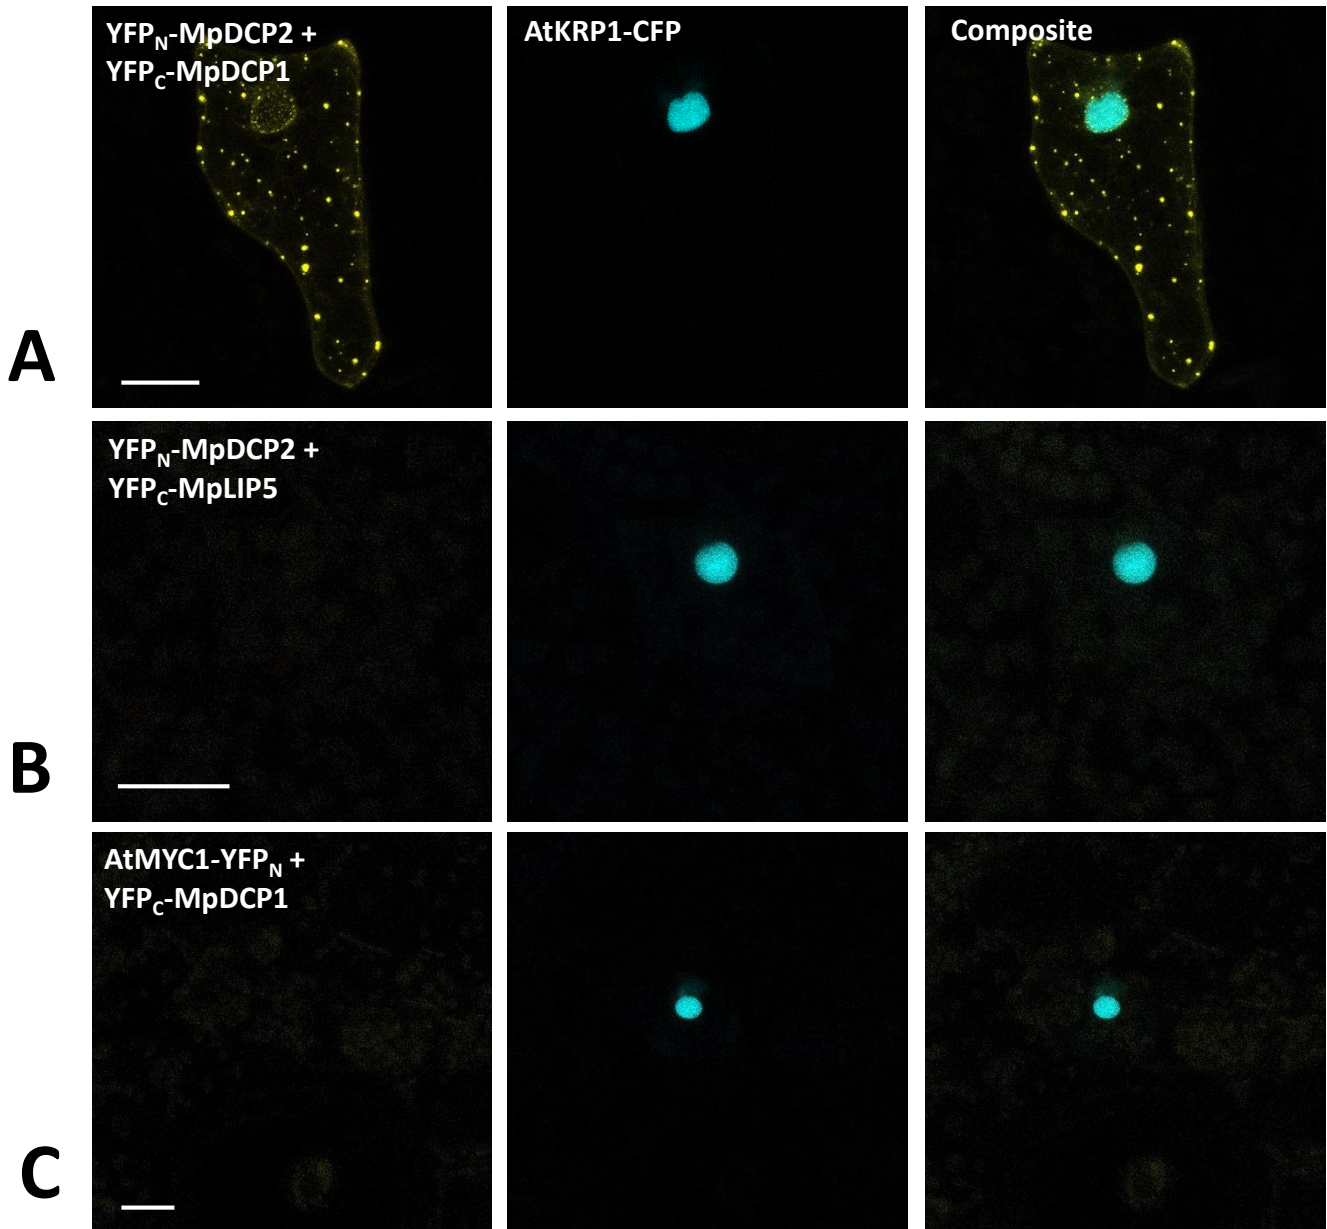

**Fig. 9: Bimolecular fluorescent complementation assays showing interaction between MpDCP1 and MpDCP2.** (A): Co-transformation of split-YFP fusion constructs of MpDCP1 and MpDCP2 result in a fluorescence signal in dot-like foci, indicating protein-protein interaction in p-bodies. (B) Co-bombardment of split-fusions with MpDCP2 and the unrelated MpLIP5 protein were used as a negative control. (C) We also co-bombarded split-versions of MpDCP1 and unrelated AtMYC1, which also led to the absence of any fluorescence signal. The constructs were co-bombarded with nuclear marker AtKRP1. Scale bar = 20  $\mu$ m. Pictures show maximum projections of z-stack captions (see Materials and methods section for details). See also Fig. S2 for other controls.

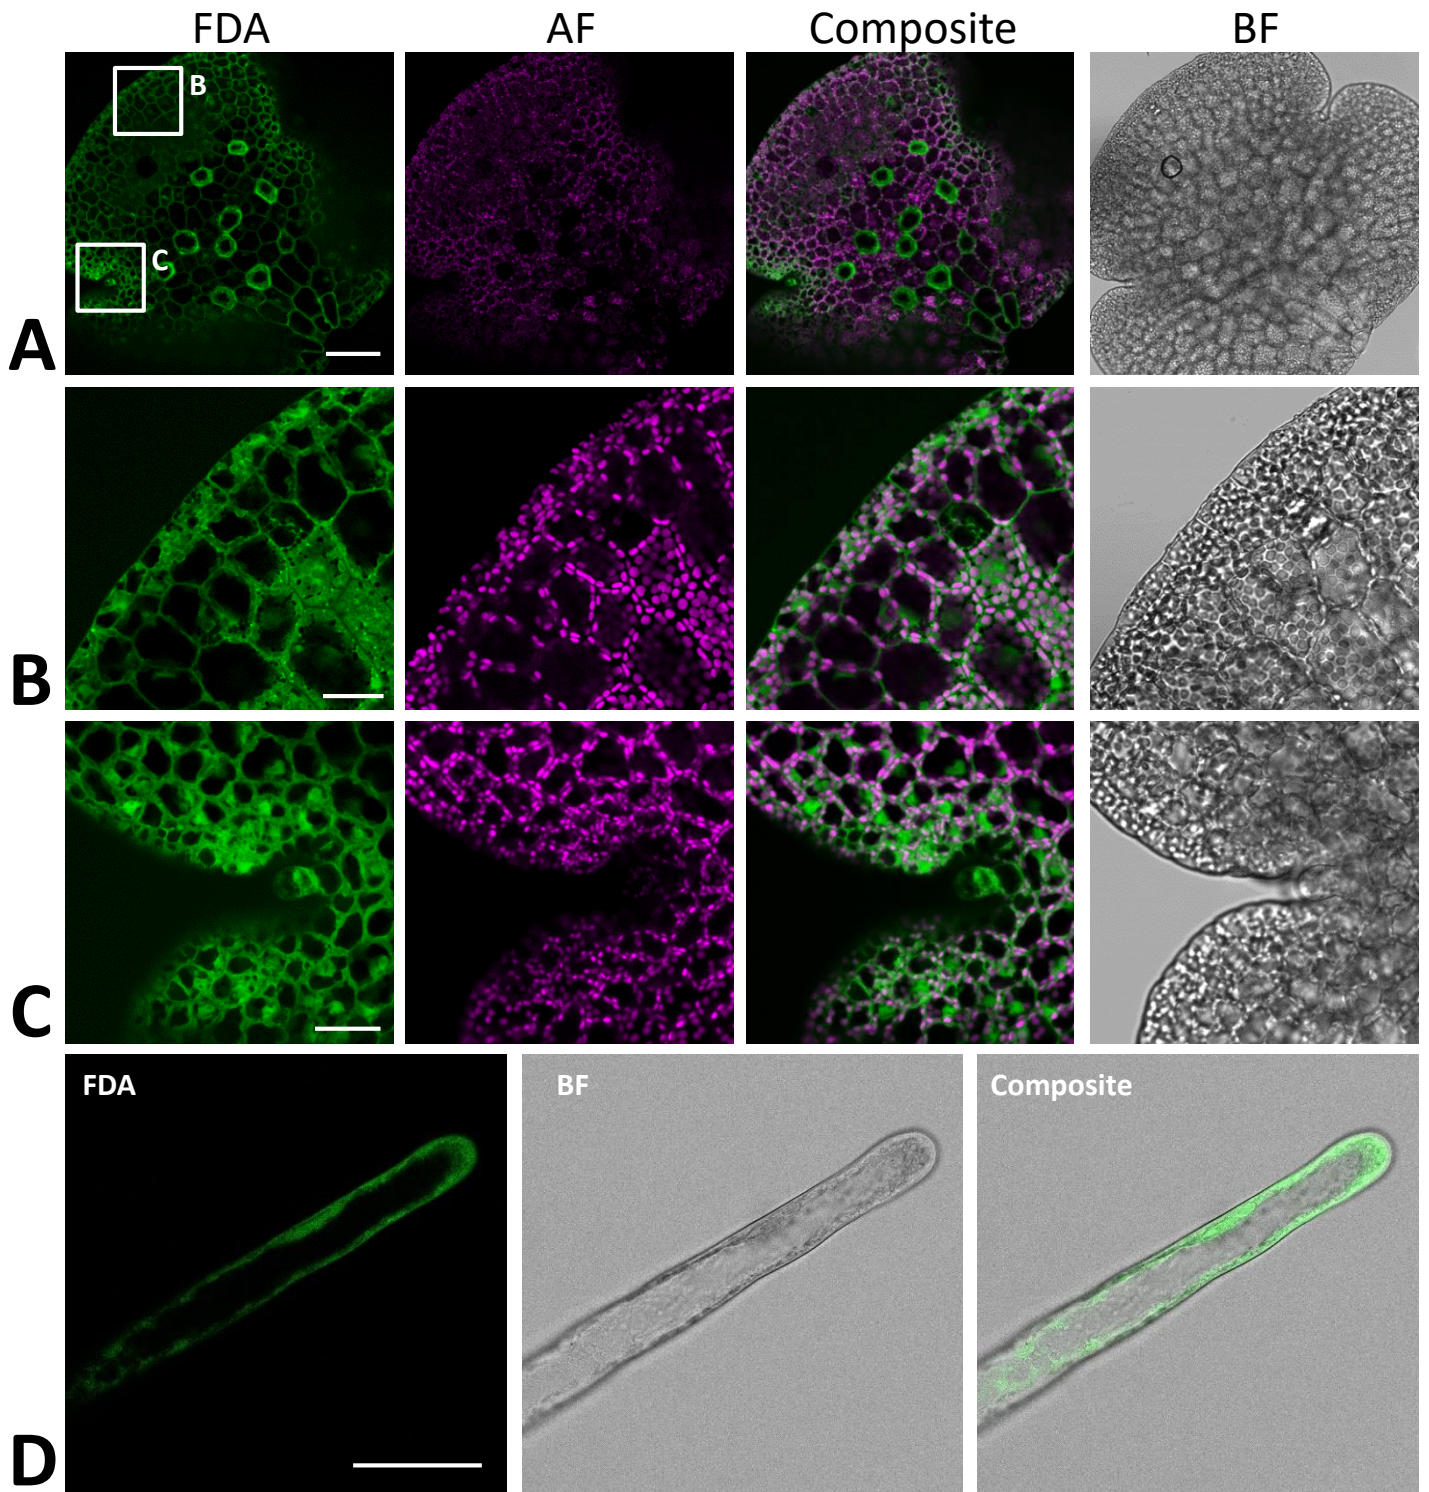

**Fig. 10: Fluorescein diacetate staining of different *M. polymorpha* cell types.** (A) Whole-thallus staining, scale bar = 100  $\mu\text{m}$ , with close-up captures of (B) a distal thallus fragment, scale bar = 30  $\mu\text{m}$ , and (C) a meristematically active apical notch, scale bar = 30  $\mu\text{m}$ . All three images show localization of FDA to the cytoplasm, as contrasted by absence of FDA-specific fluorescence in the vacuole and autofluorescent (AF) chloroplasts. Pictures show maximum projections of z-stack captures (see Materials and methods section for details). (D) FDA staining of a Tak-1 rhizoid of a 5 days-old gemmaling. BF = bright field. Scale bar = 50  $\mu\text{m}$ .



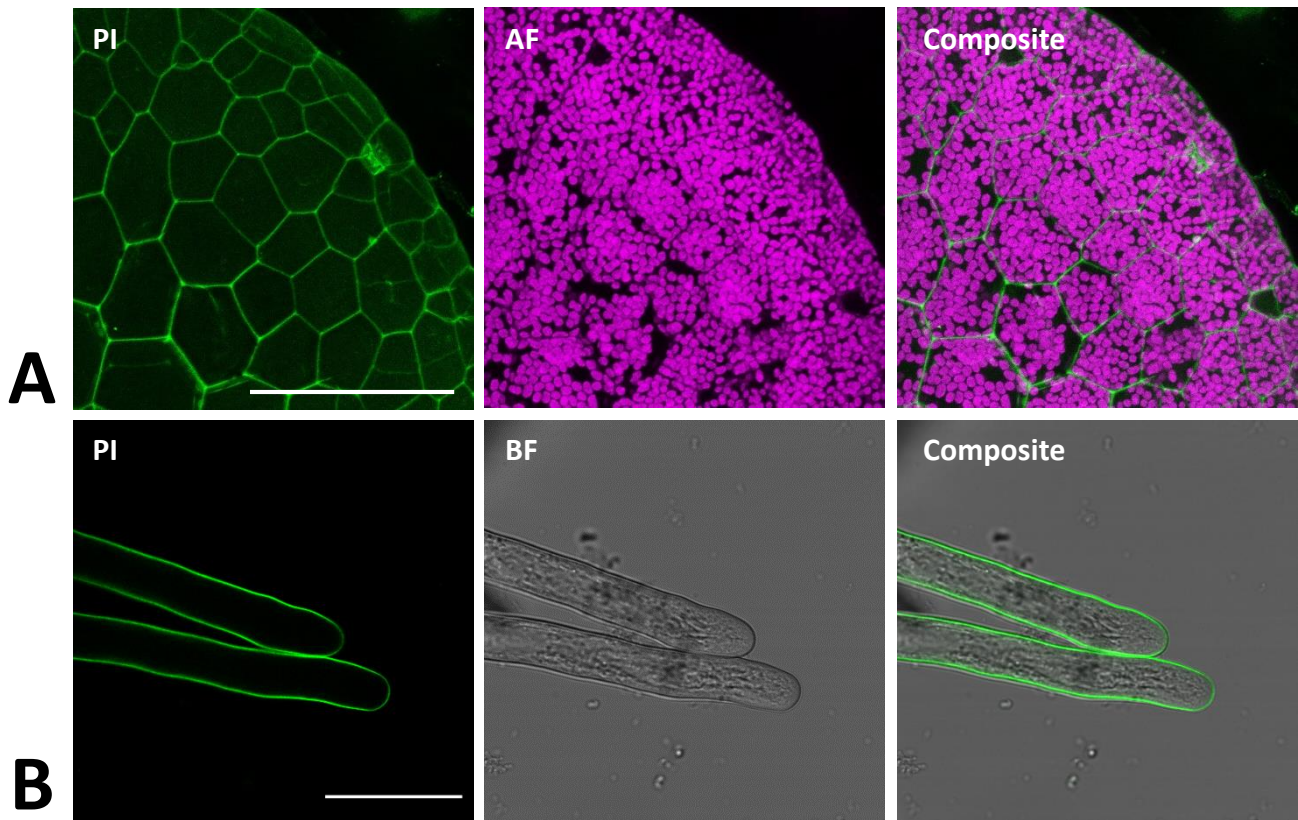

**Fig. 11. Propidium iodide staining of different *M. polymorpha* cell types.** Propidium iodide (PI) staining of Tak-1 rhizoids of a 2 days old gemma, staining the cell wall of both thallus epidermal cells (A; Pictures show maximum projections of z-stack) and rhizoids (B). Scale bars = 100  $\mu\text{m}$  (A) and 50  $\mu\text{m}$  (B). BF = bright field. AF = Autofluorescence (detected at an emission of 680 – 700 nm).

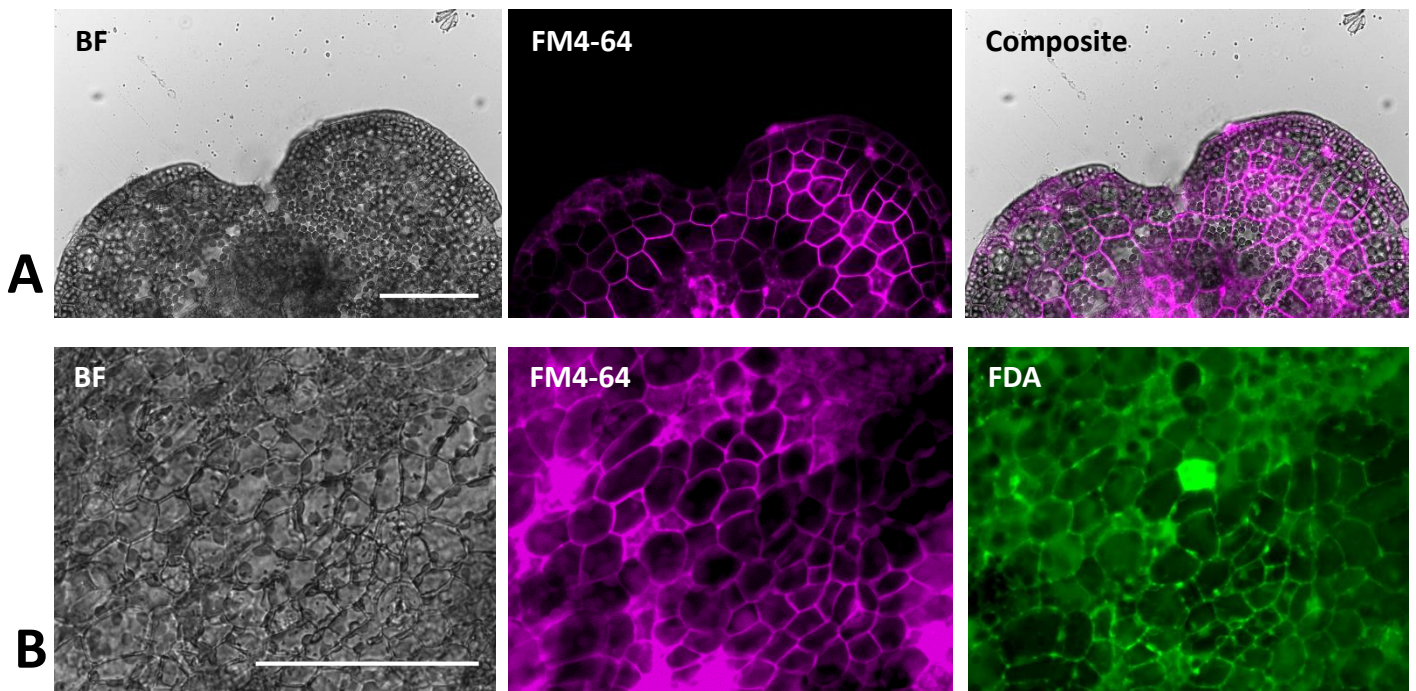

**Fig. 12. FM4-64 staining of *M. polymorpha* thallus epidermal cells.** (A) FM4-64 staining of a 2 days old Tak-1 gemmaling, staining the plasma membrane of thallus epidermal cells. (B) Co-staining of FM4-64 and FDA showing opposing plasma membrane- and cytoplasm-localized fluorescence signal. BF = bright field. FDA = Fluorescein-diacetate. All scale bars = 100  $\mu\text{m}$ .

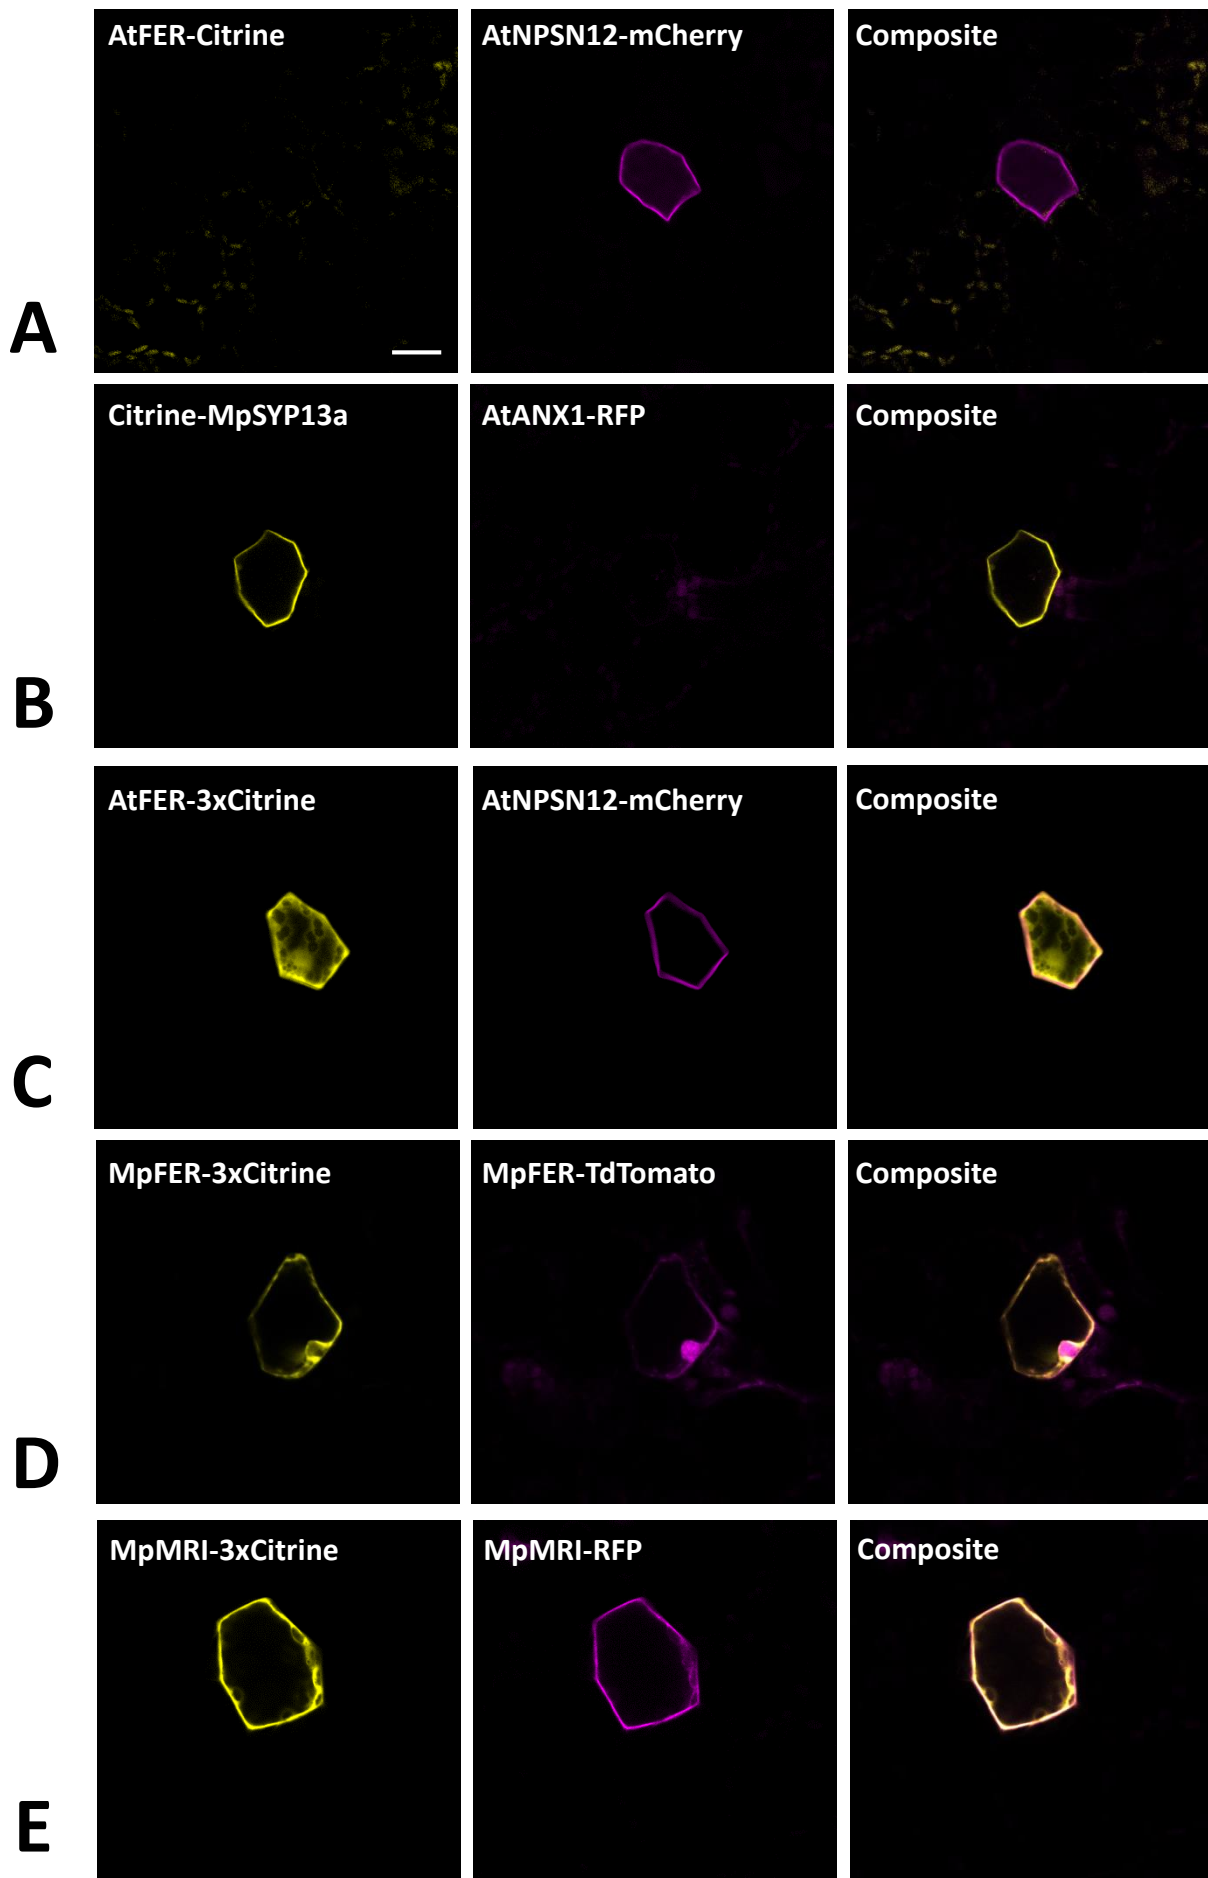

**Fig. S1: Co-expression of MLRs and MRI with single or triple tags in *Marchantia* epidermal cells.** (A) and (B) *Arabidopsis* MLRs fused to single fluorescent tag are not expressed. (C) and (D) the 3xCitrine tag leads MLRs to localize to the cytoplasm. (E) the 3xCitrine tag leads to normal cytosolic and plasma membrane localization of MpMRI. Pictures show maximum projections of z-stack captions (see Materials and methods section for details). Scale bar = 20  $\mu$ m.

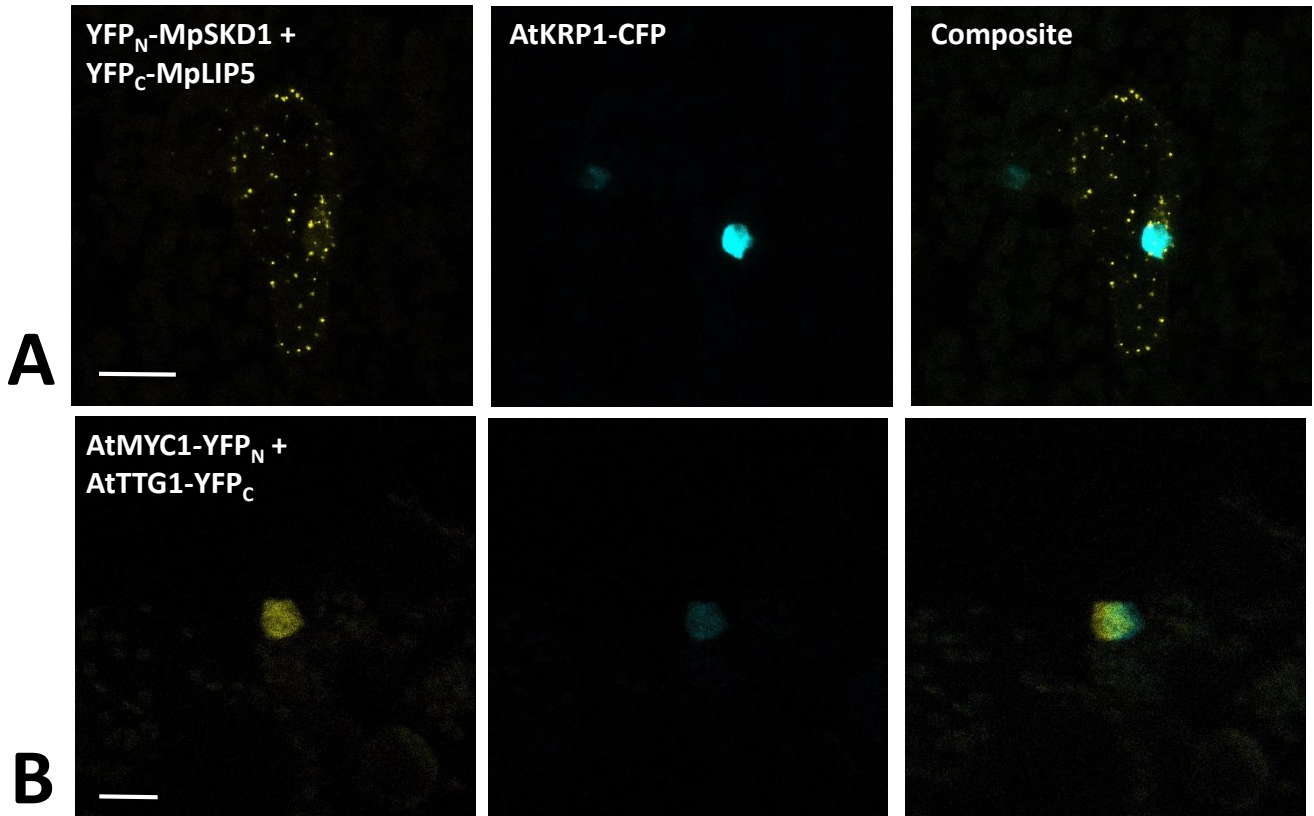

**Fig. S2: Bimolecular fluorescent complementation assay quality controls.** (A): The functionality of the negative control MpLIP5 was confirmed via co-bombardment of split-versions of MpLIP5 and the Marchantia homolog of the known Arabidopsis LIP5 interactor MpSKD1, showing a clear protein interaction in dot-like foci. (B): Split-YFP fusion constructs of AtMYC1 and AtTTG1, known interactors, were co-bombarded and shown to physically interact in *M. polymorpha* thallus epidermal cells, supporting the functionality of AtMYC1-YFP<sub>N</sub>. The constructs were co-bombarded with nuclear marker AtKRP1. Scale bar = 20  $\mu$ m. Pictures show maximum projections of z-stack captions (see Materials and methods section for details).



Marchantia

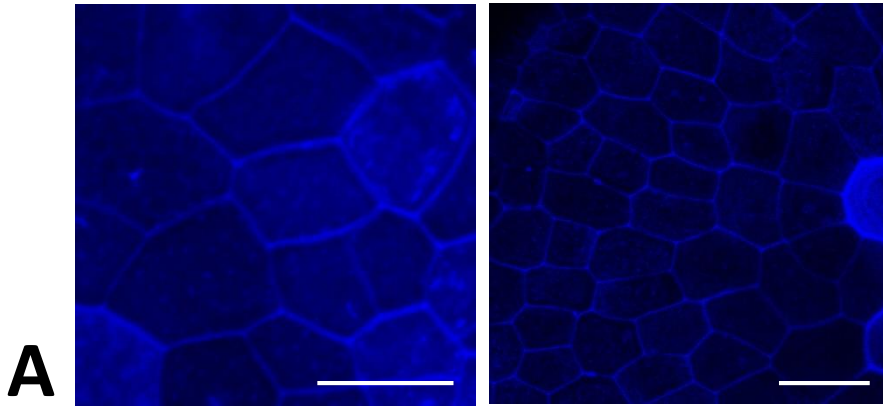

Arabidopsis

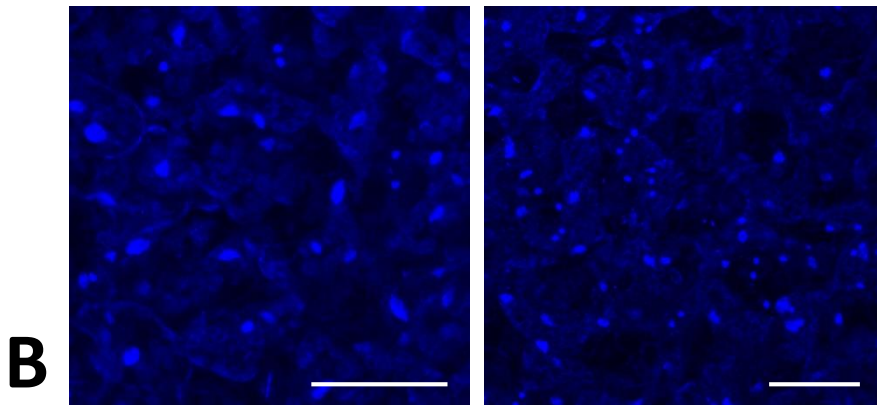

**Fig. S3: Nuclei of *M. polymorpha* cannot be readily stained with DAPI.** (A) DAPI staining of Tak-1 epidermal cells of a 4 days-old gemmaling. (B) DAPI staining of leaf epidermal cells of a 2 weeks old *A. thaliana* plant. Note the stained nuclei. All scale bars = 50  $\mu$ m.
